# Supplementary material for: Water induced ultrathin Mo2C nanosheets with high-density grain boundaries for enhanced hydrogen evolution
Source: PubMed Central journal article supplement (PMC9700844; doi:10.1038/s41467-022-34976-1), 2022-11-24
Supplement: 41467_2022_34976_MOESM1_ESM.pdf [file 41467_2022_34976_MOESM1_ESM.pdf]

# **Supplementary Information**

**Water Induced Ultrathin Mo<sub>2</sub>C Nanosheets with High-Density Grain**

**Boundaries for Enhanced Hydrogen Evolution**

Yang *et al.*

## Supplementary Figures

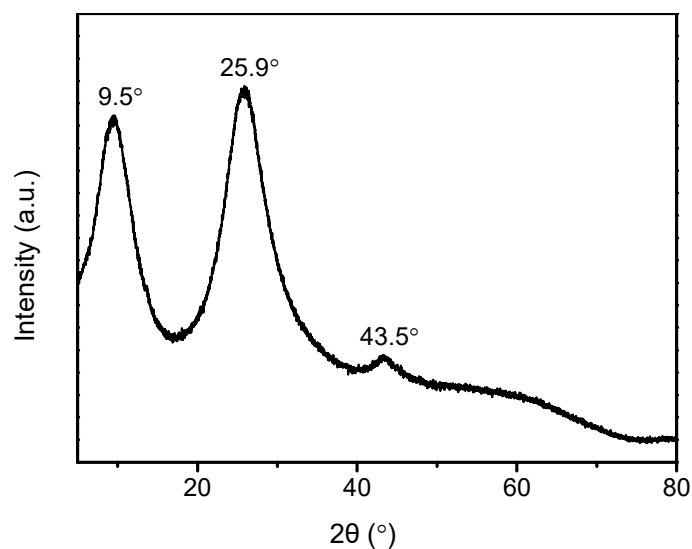

**Supplementary Fig. 1. XRD pattern of MoO<sub>3</sub>/RGO intermediate.** The sharp peak around 9.5° is attributed to GO with an interlayer spacing of 0.93 nm, which is attributed to the introduction of oxygen-containing groups into the graphite lattice. The peaks at 25.9° and 43.5° are assigned to the (002) and (100) planes of 2H phase of graphite with *d*-spacing of 0.34 nm. No peaks derived from MoO<sub>3</sub> are detected<sup>1</sup>, clearly showing the amorphous nature of MoO<sub>3</sub>.

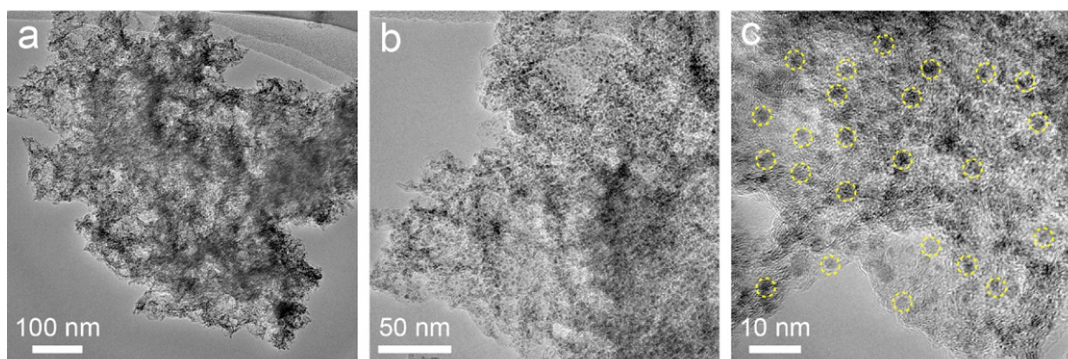

**Supplementary Fig. 2. TEM images of Mo<sub>2</sub>C/NG.** The Mo<sub>2</sub>C NPs are highlighted by yellow dotted circles.

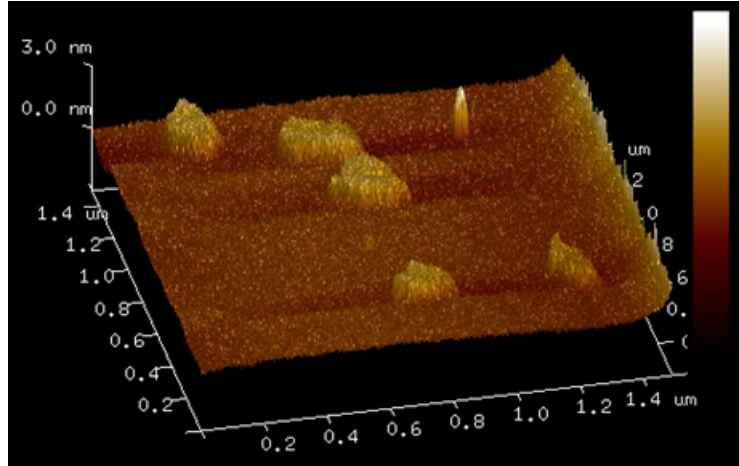

**Supplementary Fig. 3. The corresponding 3D topography of Fig. 2c in the main text.**



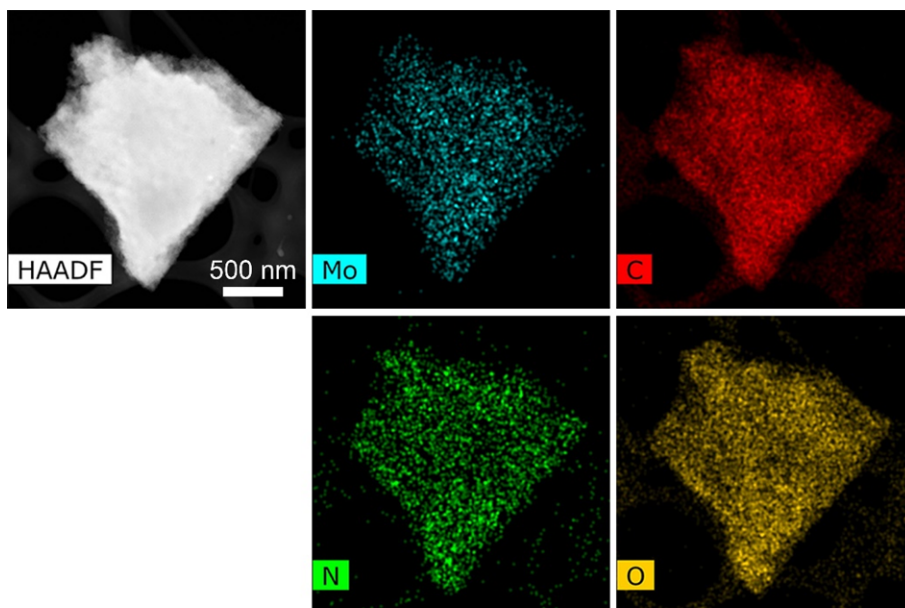

**Supplementary Fig. 4. HAADF-STEM image of H-Mo<sub>2</sub>C/NG and the corresponding EDS mapping images of Mo, C, N, and O elements.** The spatial distribution of Mo, C, and N elements reveals the uniform growth of Mo<sub>2</sub>C NSs over NG matrix. Oxygen element can also be observed due to the surface oxidation of Mo<sub>2</sub>C nanocrystals.

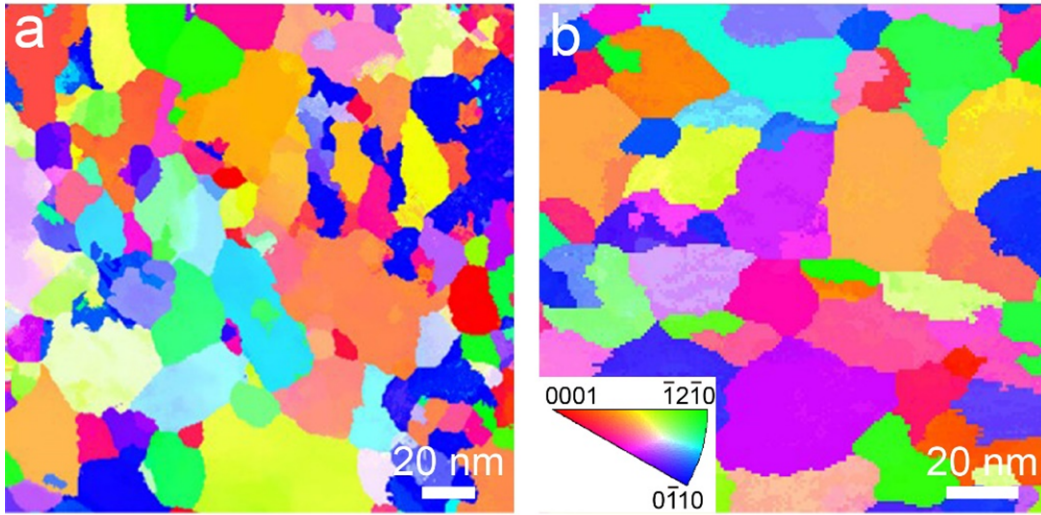

**Supplementary Fig. 5. Inverse pole figure (IPF) images from PED analysis. a** H-Mo<sub>2</sub>C/NG-13.52 and **b** H-Mo<sub>2</sub>C/NG-30.98.

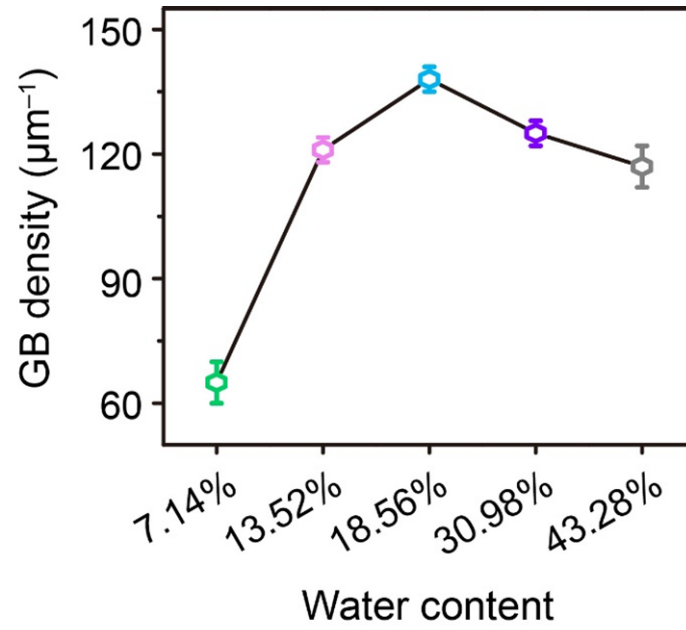

**Supplementary Fig. 6. Statistical GB density of Mo<sub>2</sub>C NSs in Mo<sub>2</sub>C hybrids.** The GB density was calculated by dividing the total GB length with the total sample area.

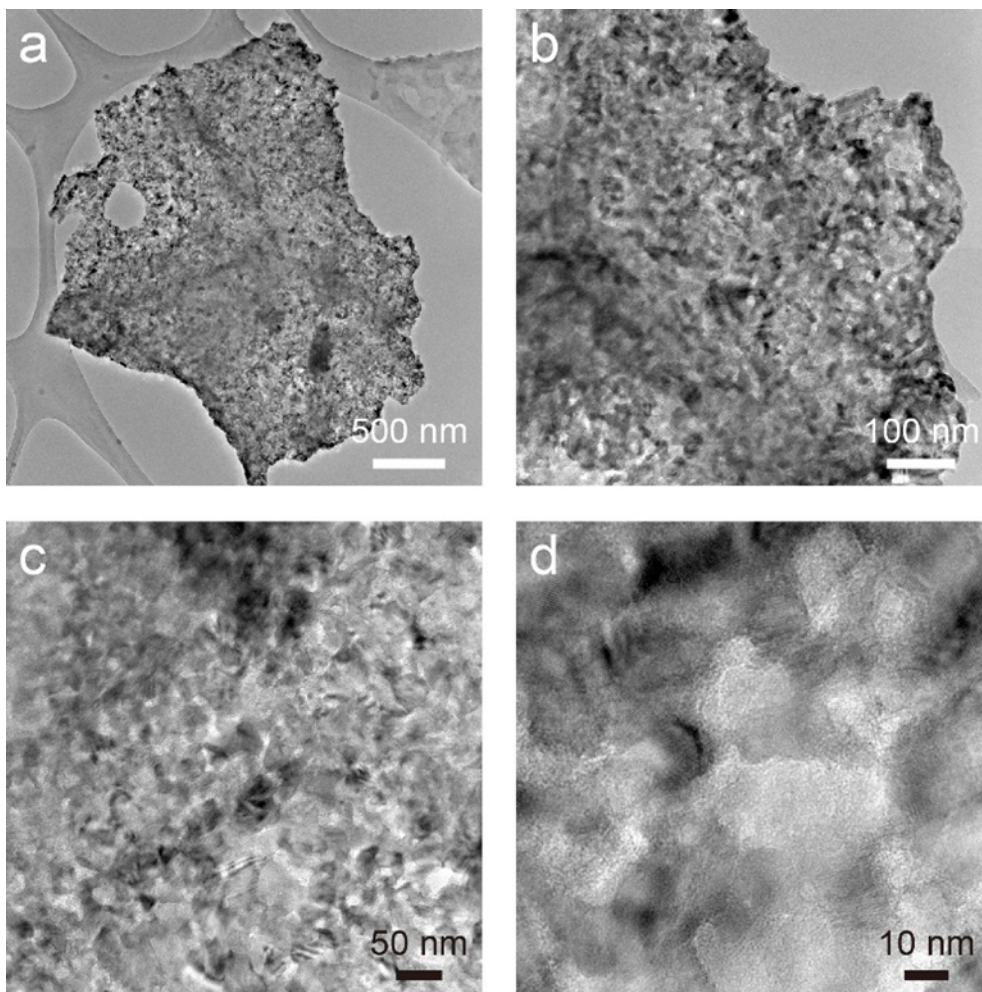

**Supplementary Fig. 7. TEM images of H-Mo<sub>2</sub>C/NG-7.14.**

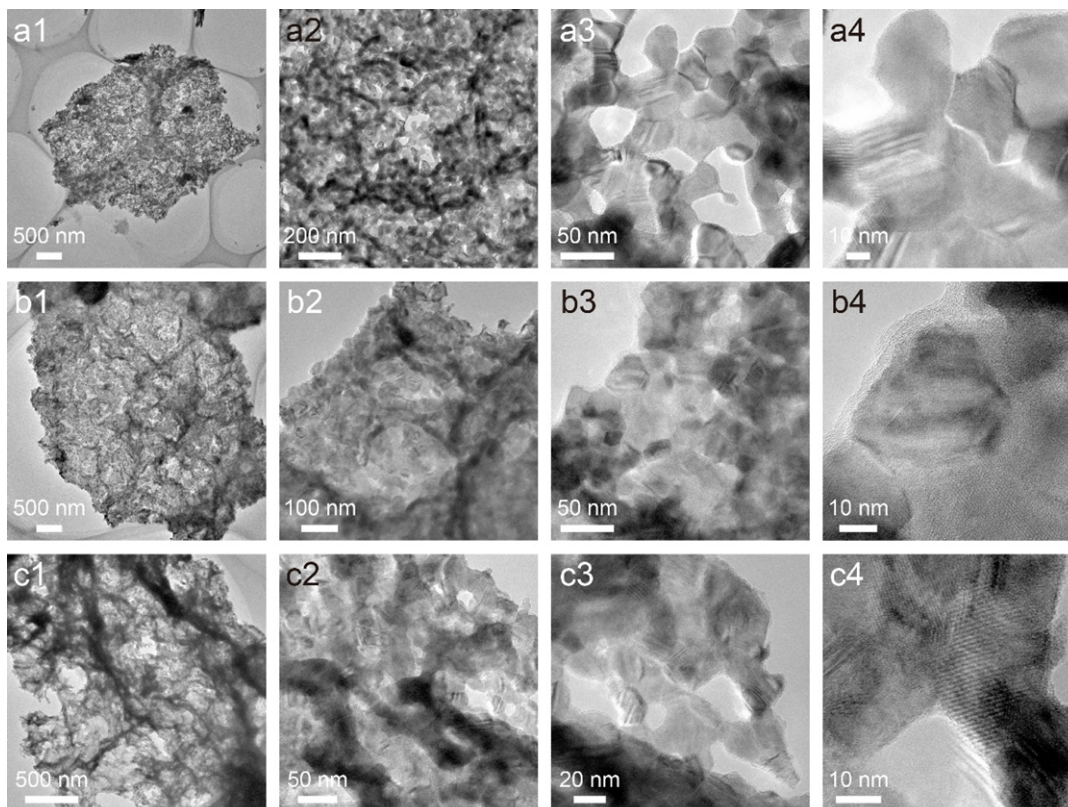

**Supplementary Fig. 8. TEM images of Mo<sub>2</sub>C hybrids. a1-a4 H-Mo<sub>2</sub>C/NG-13.52, b1-b4 H-Mo<sub>2</sub>C/NG, and c1-c4 H-Mo<sub>2</sub>C/NG-30.98.**



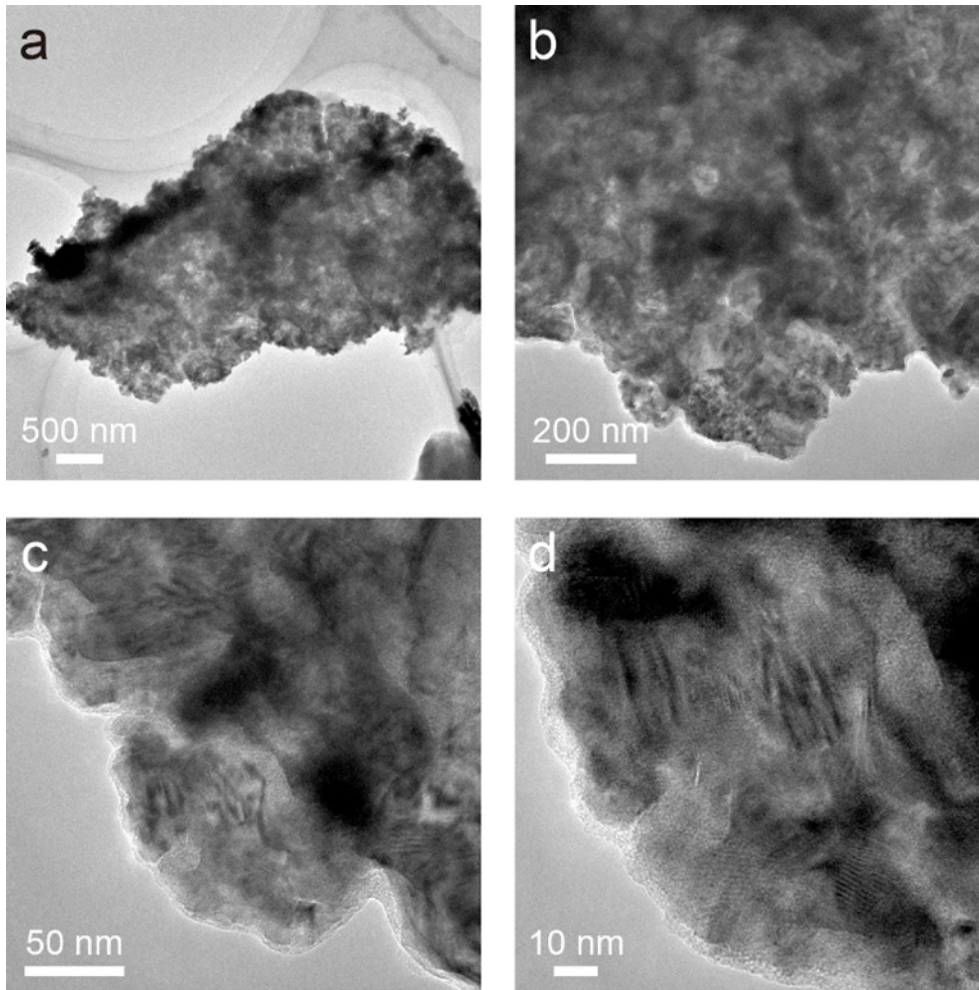

**Supplementary Fig. 9. TEM images of H-Mo<sub>2</sub>C/NG-43.28.**

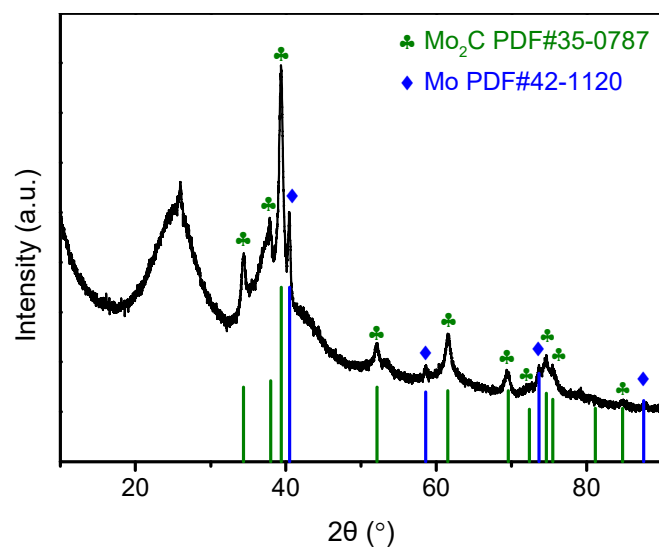

**Supplementary Fig. 10.** XRD pattern of Mo-Mo<sub>2</sub>C heterostructures on RGO. The XRD pattern reveal the formation of compositions of Mo<sub>2</sub>C nanocrystals and metallic Mo with the same procedure as H-Mo<sub>2</sub>C/NG without NH<sub>3</sub>.

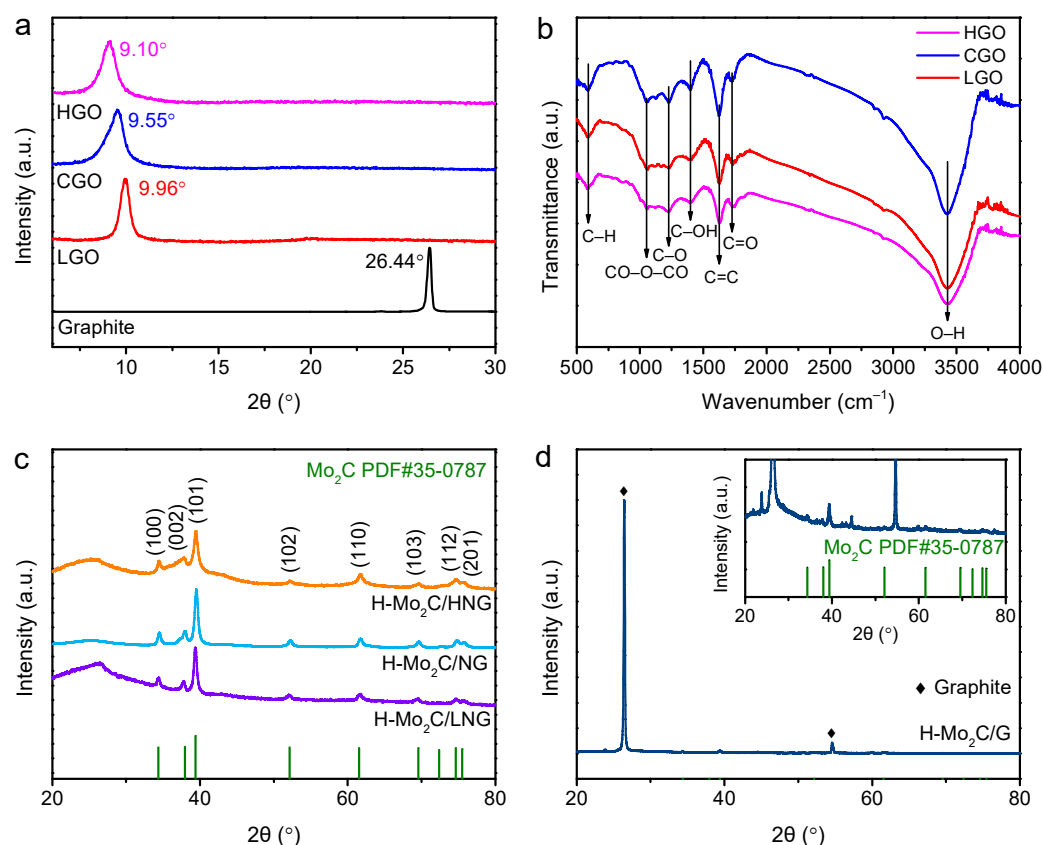

**Supplementary Fig. 11. Characterization results.** **a** XRD patterns of high oxidation degree of GO (HGO)<sup>2</sup>, common GO with medium oxidation degree (CGO) used to construct the H-Mo<sub>2</sub>C/NG, low oxidation degree of GO (LGO)<sup>3</sup>, and graphite. The graphite has a sharp diffraction (002) peak at  $2\theta = 26.44^\circ$  with an interlayer spacing of 3.37 Å calculated from Bragg equation. After oxidation and exfoliation of graphite, HGO, CGO, and LGO exhibit the characteristic (001) peaks at  $2\theta = 9.10^\circ$ ,  $9.55^\circ$ , and  $9.95^\circ$  with the corresponding interlayer spacing of 9.710, 9.254, and 8.883 Å, respectively, indicating that the order of oxidation levels is HGO>CGO>LGO. **b** Fourier transform infrared (FTIR) spectra. **c** XRD patterns of H-Mo<sub>2</sub>C/HNG, H-Mo<sub>2</sub>C/NG, and H-Mo<sub>2</sub>C/LNG. **d** XRD pattern of H-Mo<sub>2</sub>C/G. H-Mo<sub>2</sub>C/HNG, H-Mo<sub>2</sub>C/LNG, and H-Mo<sub>2</sub>C/G were synthesized under identical synthesis conditions with H-Mo<sub>2</sub>C/NG, in which CGO was replaced by HGO, LGO, and graphite respectively.



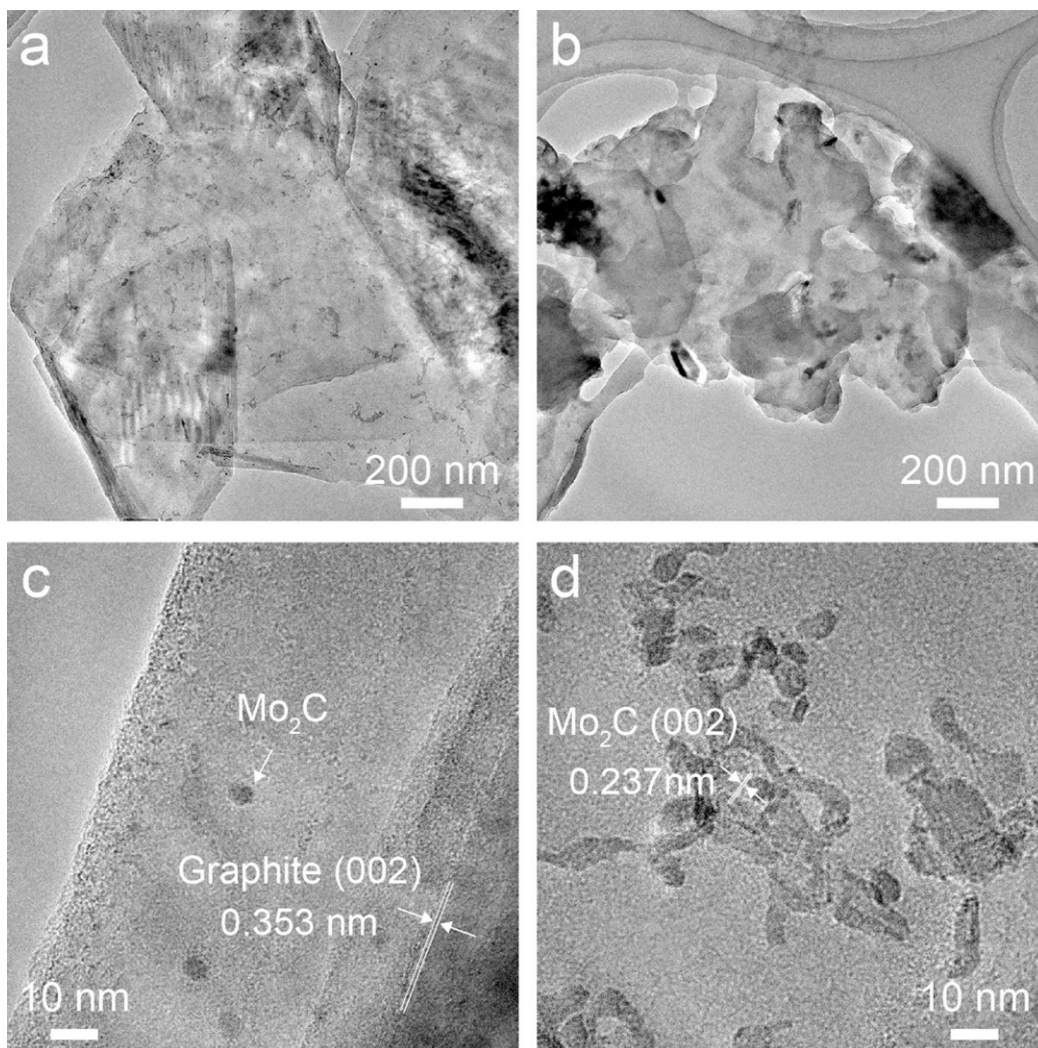

**Supplementary Fig. 12. TEM characterization of H-Mo<sub>2</sub>C/G.**

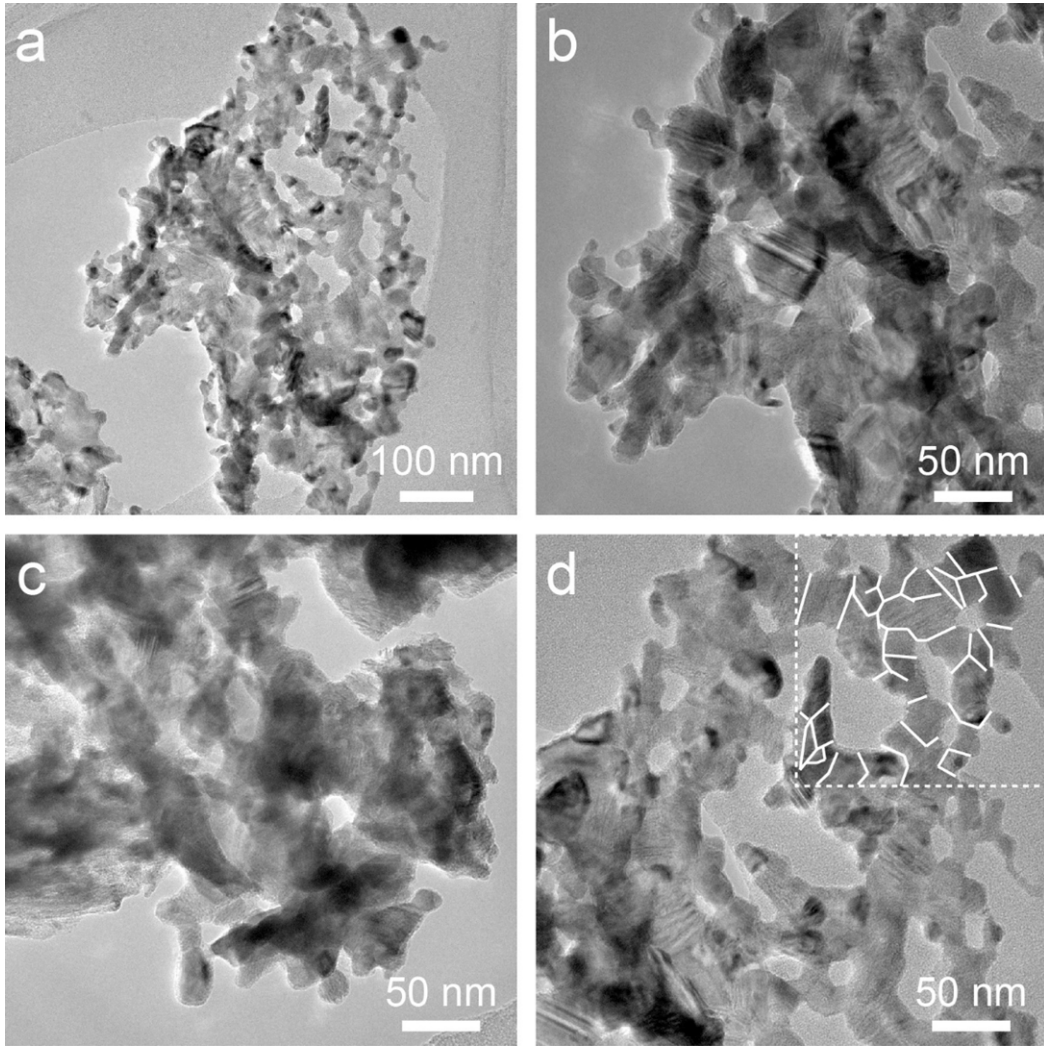

**Supplementary Fig. 13. TEM characterization of H-Mo<sub>2</sub>C/LNG.** The solid lines in boxed region in **d** point out the irregular GBs.

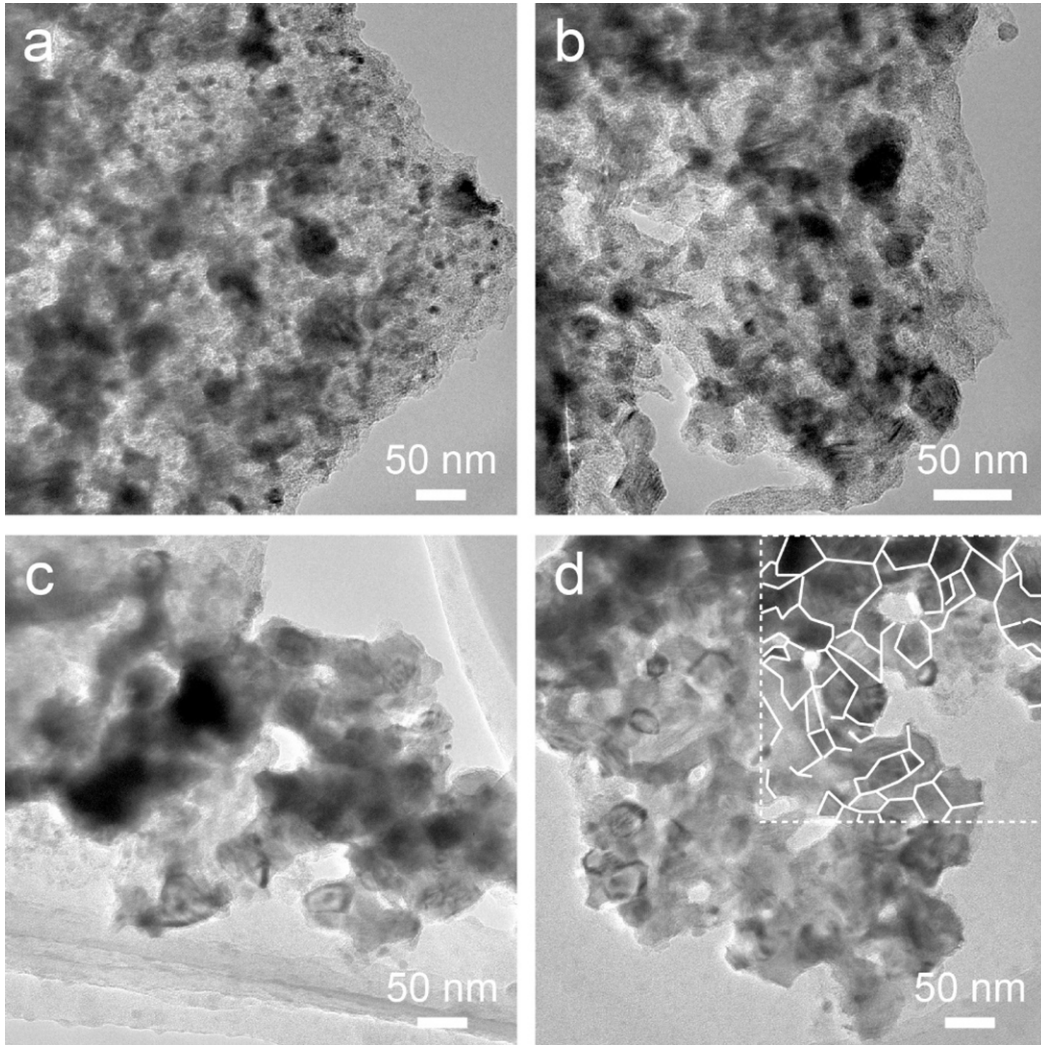

**Supplementary Fig. 14. TEM characterization of H-Mo<sub>2</sub>C/HNG.** The solid lines in boxed region in **d** point out the irregular GBs.

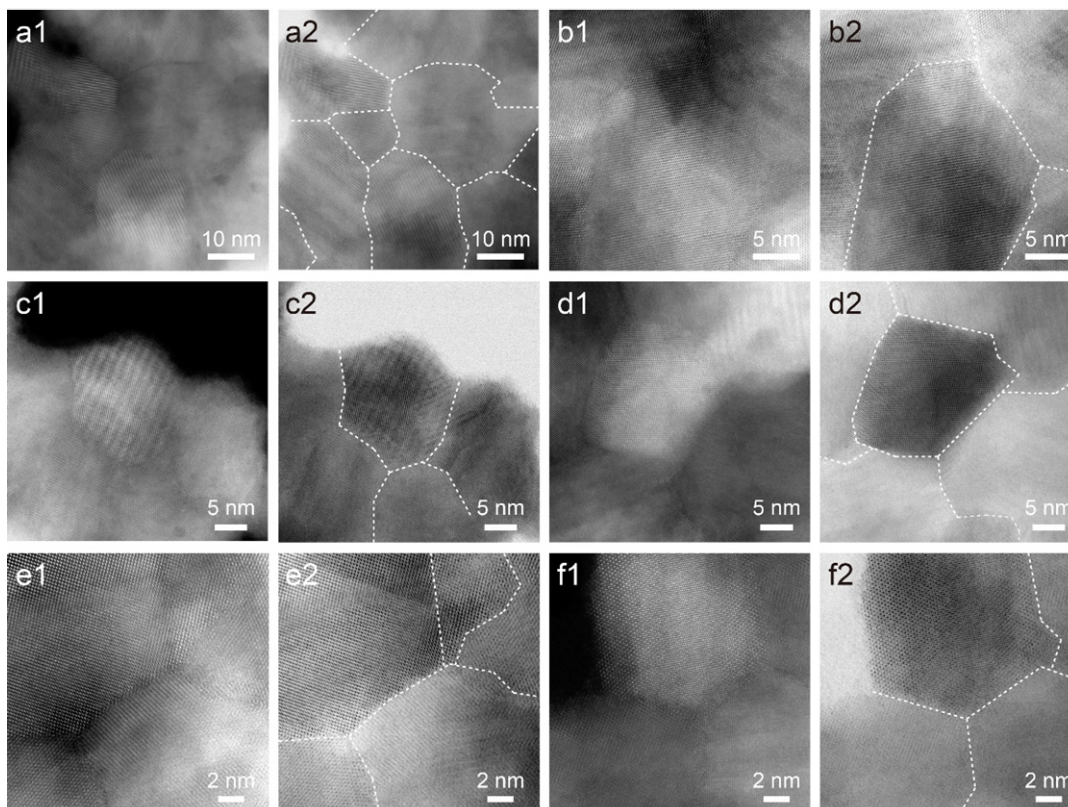

**Supplementary Fig. 15. Atomic-resolution STEM images of Mo<sub>2</sub>C NSs in H-Mo<sub>2</sub>C/NG. a1-f1 HAADF-STEM and a2-f2 bright-field STEM (BF-STEM) images, the white dashed lines point out the irregular GBs.**



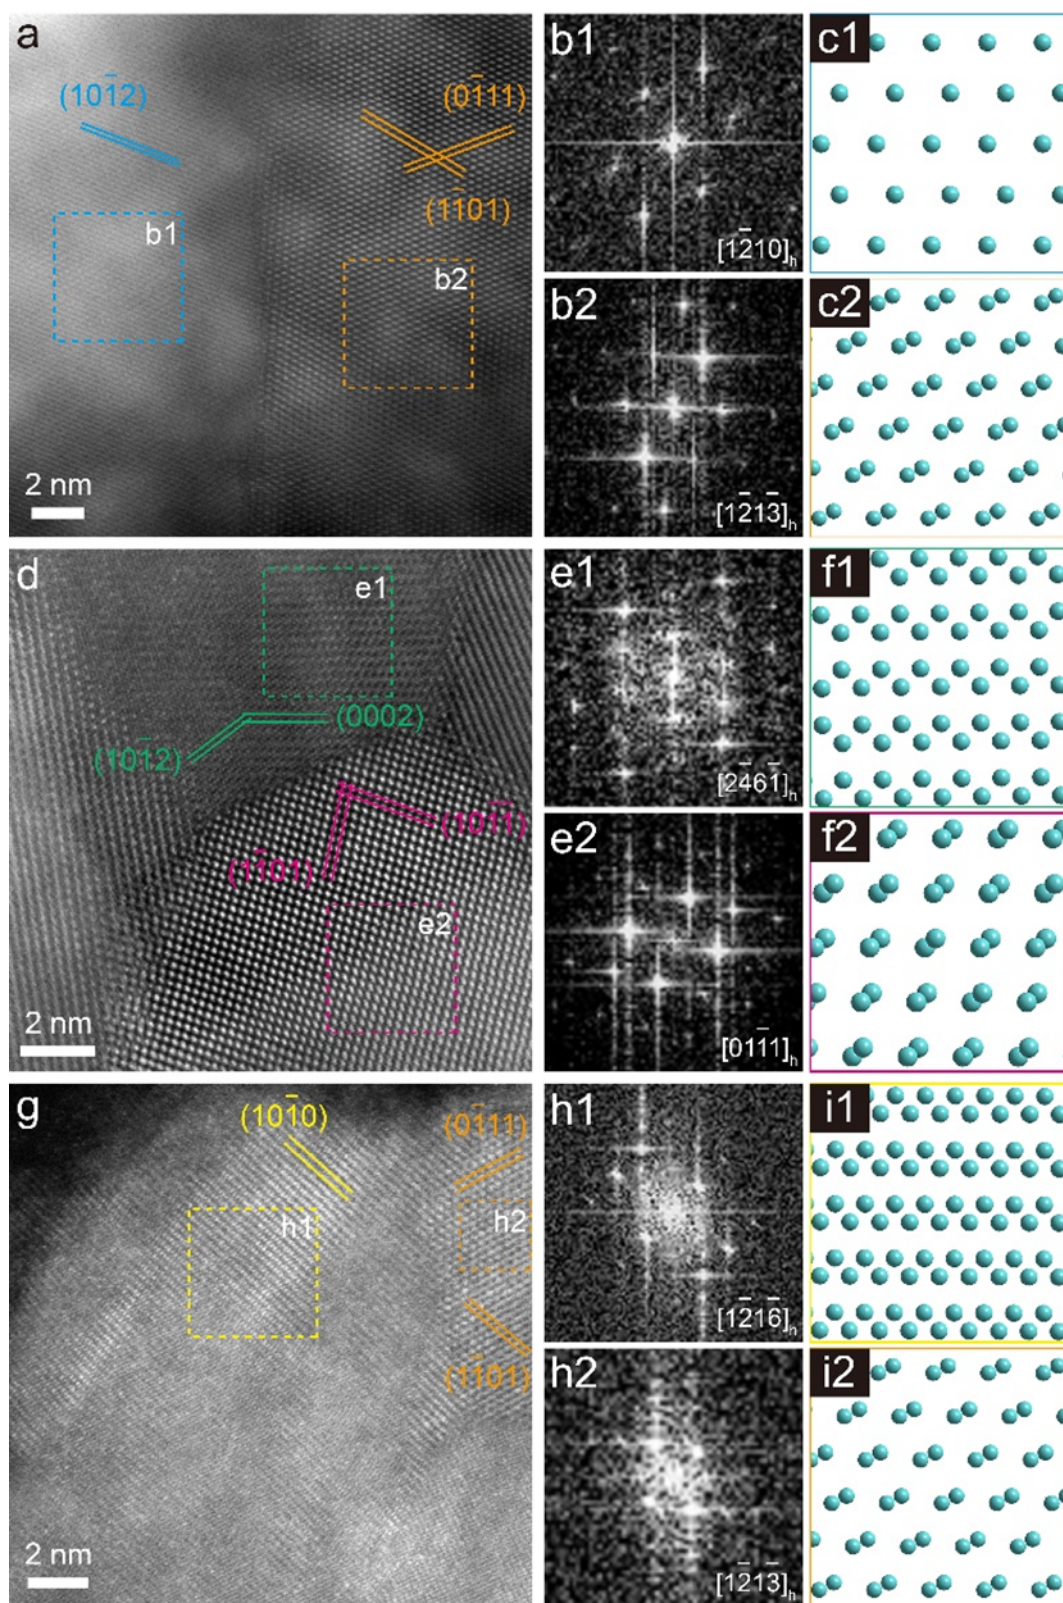

**Supplementary Fig. 16. Local atomic structure of hcp/hcp GBs on Mo<sub>2</sub>C NSs in**

**H-Mo<sub>2</sub>C/NG. a** HAADF-STEM image taken along the  $[1\bar{2}10]_h/[1\bar{2}1\bar{3}]_h$  direction. **b1,**

**b2** FFT patterns taken from the corresponding royal blue and orange dotted squares in

**a**, and **c1**, **c2** the corresponding projected supercell models with hcp Mo<sub>2</sub>C structures. **d** HAADF-STEM image taken along the  $[2\bar{4}6\bar{1}]_h/[01\bar{1}1]_h$  direction. **e1**, **e2** FFT patterns taken from the corresponding dark green and dark pink dashed squares in **d**, and **f1**, **f2** the corresponding projected supercell models with hcp Mo<sub>2</sub>C structures. **g** HAADF-STEM image taken along the  $[1\bar{2}1\bar{6}]_h/[1\bar{2}1\bar{3}]_h$  direction. **h1**, **h2** FFT patterns taken from the corresponding yellow and orange dashed squares in **g**, and **i1**, **i2** the corresponding projected supercell models with hcp Mo<sub>2</sub>C structures. The cyan balls represent Mo atoms.

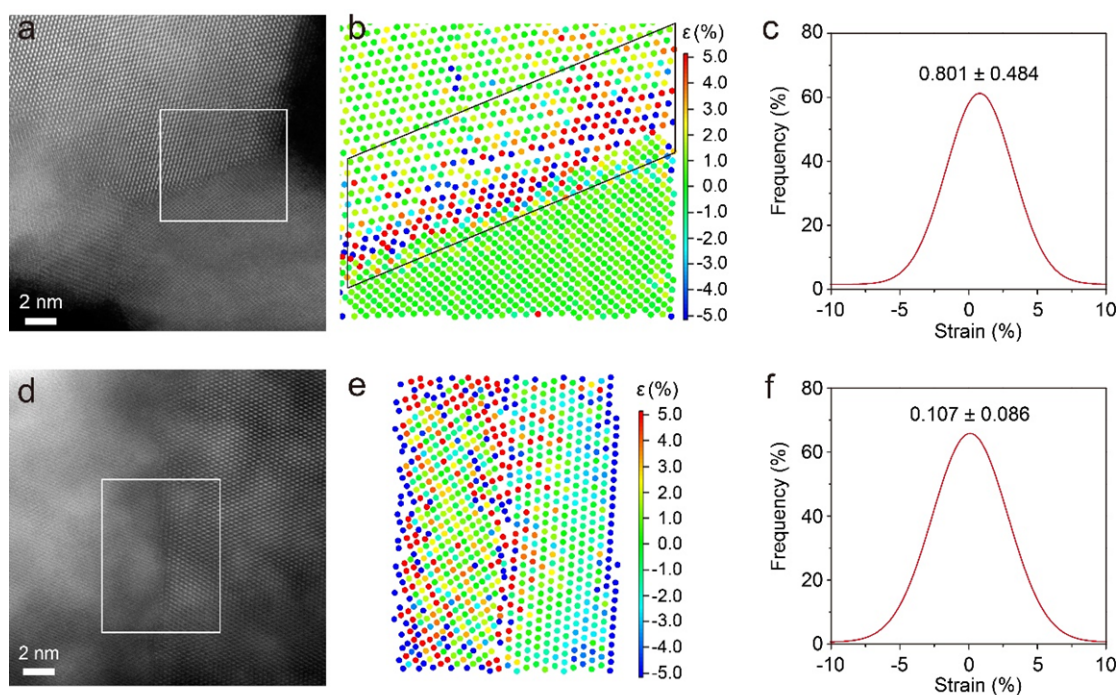

**Supplementary Fig. 17. HADDF-STEM images and strain behaviours of Mo<sub>2</sub>C NSs in H-Mo<sub>2</sub>C/NG.** **a** HADDF-STEM image. **b** Lattice distortion determined from the white-boxed region in **a**. **c** Quantitative distribution of shear strain for atoms in the black-boxed region in **b**. **d** HADDF-STEM image. **e** Lattice distortion determined from the white-boxed region in **d**. **f** Quantitative distribution of shear strain for atoms in **e**. The atoms are coloured according to strain scale, where colours with positive values represent tensile strain and with negative values represent compressive strain.

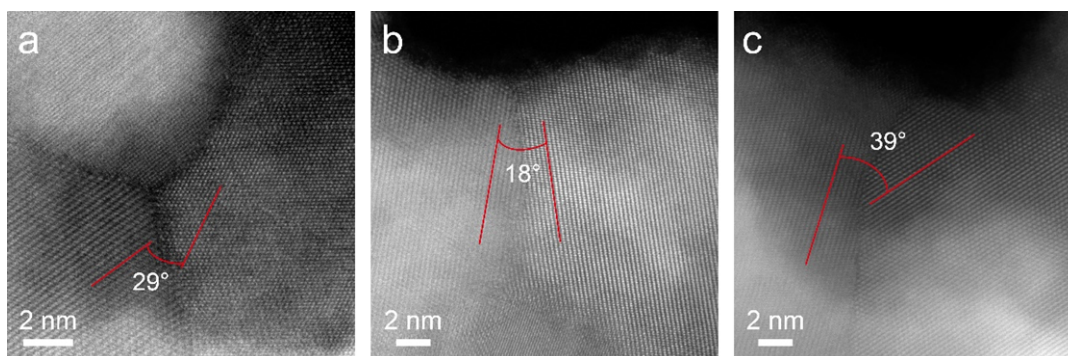

**Supplementary Fig. 18. Atomic-resolution HAADF-STEM images of GBs on Mo<sub>2</sub>C NSs in H-Mo<sub>2</sub>C/NG.**



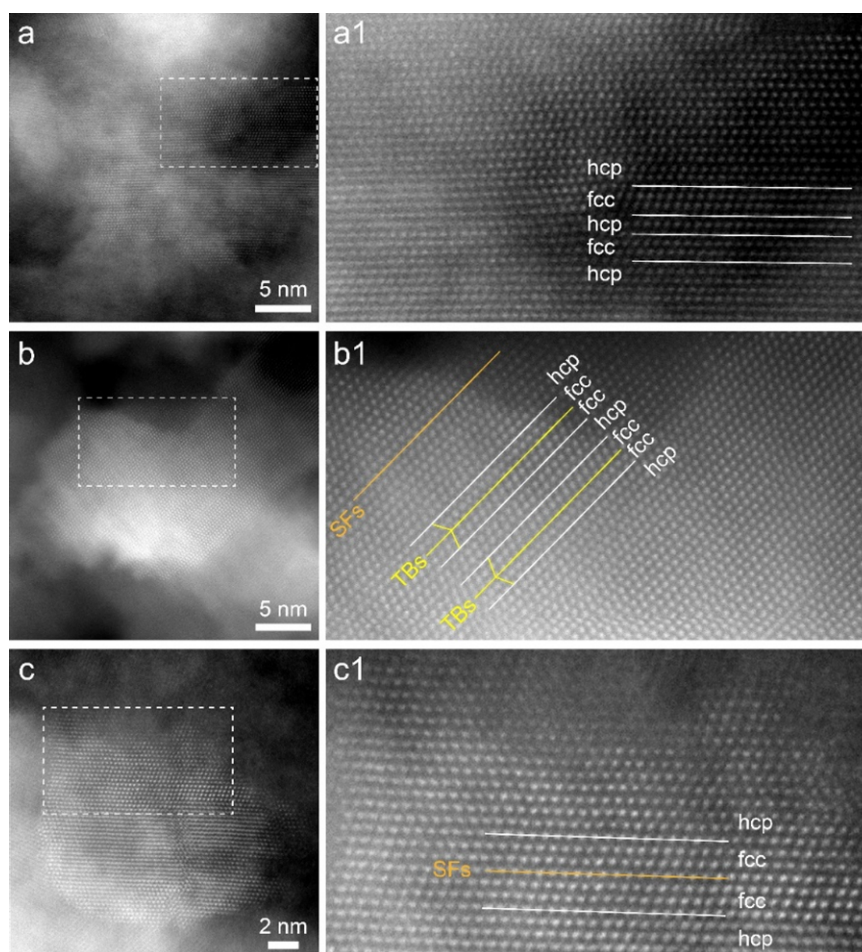

**Supplementary Fig. 19. Local atomic structure of fcc/hcp GBs on Mo<sub>2</sub>C NSs in H-Mo<sub>2</sub>C/NG. a-c** HAADF-STEM images taken along the  $[110]_f/[11\bar{2}0]_h$  direction. **a1-c1** Corresponding enlarged HAADF-STEM images of the rectangular regions in **a-c**. The fcc/hcp GBs are marked with white solid lines. Typical defects including SFs and TBs are marked with orange and yellow lines, respectively.

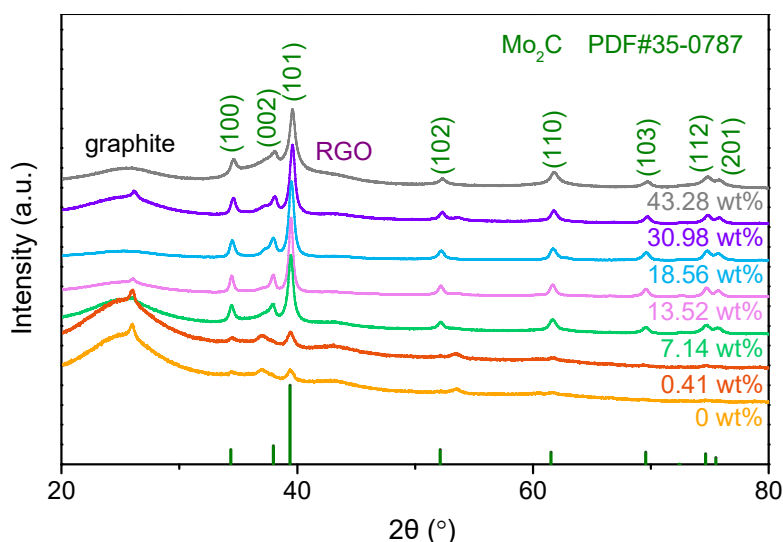

**Supplementary Fig. 20. XRD patterns of Mo<sub>2</sub>C hybrids.** The peaks near  $2\theta = 26^\circ$  and  $43^\circ$  are respectively assigned to the (002) and (100) reflections of graphene. And the weak peaks at  $37^\circ$  and  $53^\circ$  are considered to be the ( $\bar{2}11$ ) and ( $\bar{2}22$ ) planes of MoO<sub>2</sub> (PDF#32-0671), respectively. With the increase of water content, Mo<sub>2</sub>C hybrids exhibit gradually enhanced diffraction peaks, which demonstrates that water promotes the morphological evolution of Mo<sub>2</sub>C during carbonization process. Furthermore, the shift of peak positions for H-Mo<sub>2</sub>C/NG and Mo<sub>2</sub>C/NG is negligible, suggesting that the mean lattice distortion of the chemically connected Mo<sub>2</sub>C NSs is almost neutralized. This result could be attributed to the anisotropic connection of each grain, which results in the mutual cancellation of stretched and suppressed defects, consistent with HADDF-STEM strain analyses. Mo<sub>2</sub>C nanocomposites obtained by the anhydrous carburization process contain a small amount of MoO<sub>2</sub>. However, as water content retained in MoO<sub>3</sub>/RGO intermediate above 7.14 wt%, the molybdenum oxide peaks in Mo<sub>2</sub>C hybrids prepared by the water-assisted carbothermal reaction are ignorable, indicative of a successful chemical conversion of amorphous MoO<sub>3</sub> into crystalline Mo<sub>2</sub>C. These results also demonstrate that water promotes the formation of Mo<sub>2</sub>C to a certain extent.

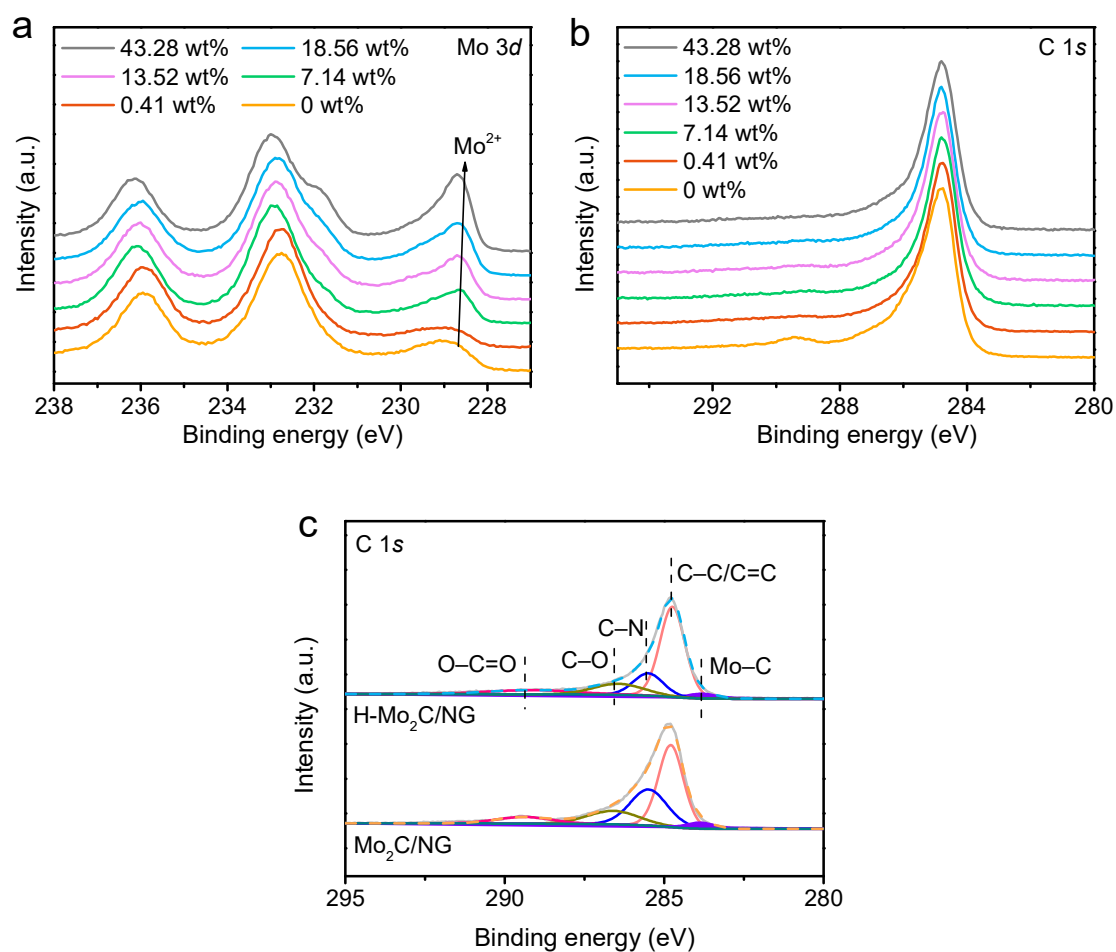

**Supplementary Fig. 21. High resolution XPS spectra.** **a** Mo 3d and **b** C 1s XPS spectra of Mo<sub>2</sub>C hybrids. **c** High resolution C 1s XPS spectra of H-Mo<sub>2</sub>C/NG and Mo<sub>2</sub>C/NG. The atomic percentages of Mo<sup>3+</sup> in H-Mo<sub>2</sub>C/NG and Mo<sub>2</sub>C/NG are 10.01 at% and 8.83 at% (Fig. 4b), respectively. Although the introduction of nitrogen atoms into Mo<sub>2</sub>C is beneficial for electrocatalytic HER, the nitrogen species in Mo<sub>2</sub>C have very little effect on HER activity<sup>4-6</sup>. The peaks of Mo<sup>2+</sup> species shift to lower binding energy, accompanied by a significant increase of peak intensity, indicating that water promotes the formation of Mo<sub>2</sub>C and simultaneously regulates the electronic structure. The C 1s spectra of H-Mo<sub>2</sub>C/NG and Mo<sub>2</sub>C/NG are similar and can be deconvoluted into five individual peaks of Mo-C (284.1 eV), C-C/C=C (284.8 eV), C-N (285.6 eV), C-O (286.5 eV), and O=C-O (289.6 eV) bonds<sup>7</sup>.

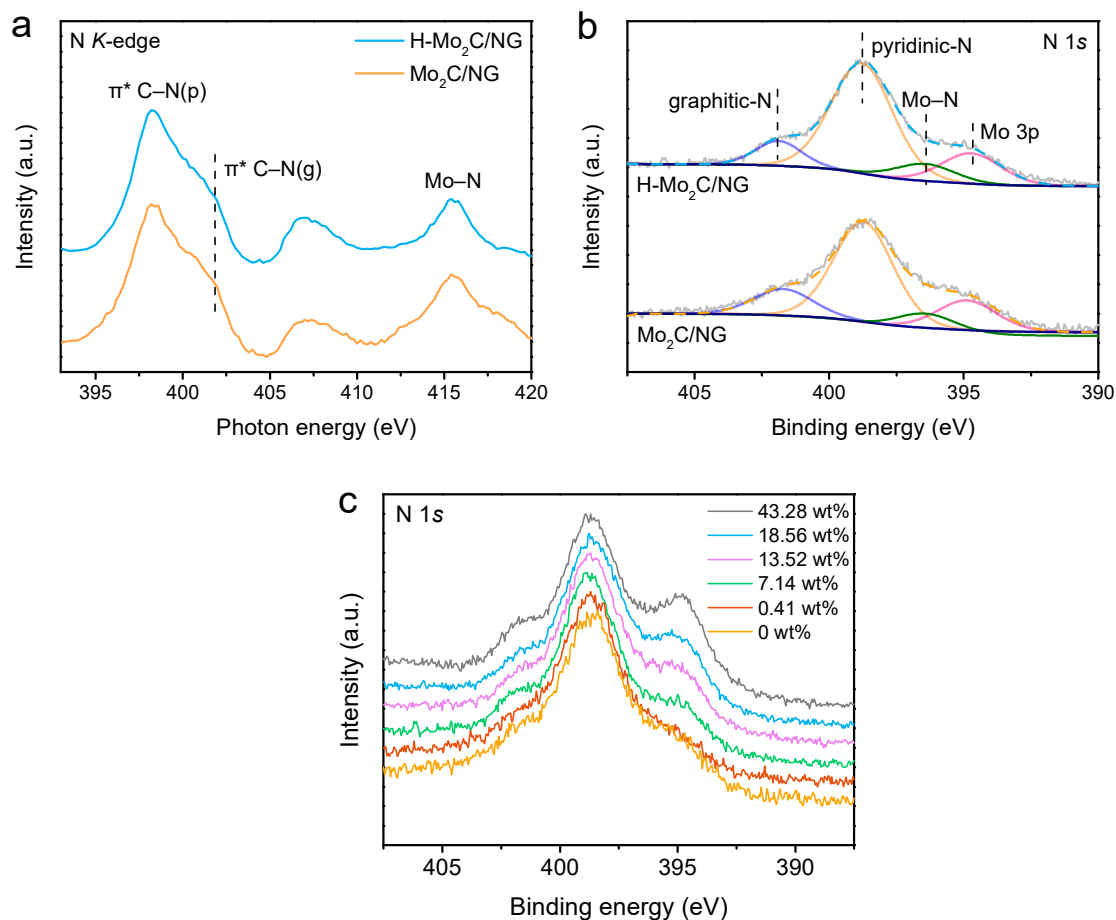

**Supplementary Fig. 22. N *K*-edge XANES spectra and N 1s XPS spectra.** **a** N *K*-edge XANES spectra of H-Mo<sub>2</sub>C/NG and Mo<sub>2</sub>C/NG. **b, c** High resolution N 1s XPS spectra of Mo<sub>2</sub>C hybrids. In the N *K*-edge region, the resonances at 398.3 eV and 401.8 eV are assigned to  $\pi^*$  C–N(p) (pyridinic-N) and  $\pi^*$  C–N(g) (graphitic-N) in NG<sup>8</sup>. The peak of 407.4 eV is designated as general transition from the N 1s core level to the C–N  $\sigma^*$  state<sup>9</sup>. In the N 1s spectra, the peaks located at 394.7, 396.4, 398.8, and 401.9 eV can be ascribed to Mo 3*p*, Mo–N, pyridinic-N, and graphitic-N species, respectively<sup>6</sup>. The intensity of Mo–N species increases slightly with the increase of water content, indicating that a certain water can also promote N-doping of Mo<sub>2</sub>C. Moreover, although the nitrogen concentration in graphene for Mo<sub>2</sub>C/NG is higher than that of H-Mo<sub>2</sub>C/NG, the types and proportions of nitrogen species in both hybrids are basically the same.

Meanwhile, DFT calculations show that the free energies of hydrogen adsorption on graphitic-N and pyridinic-N are 0.74 and 0.85 eV<sup>5</sup>, respectively, which are still much larger than that of Mo<sub>2</sub>C (−0.41 eV)<sup>7</sup>. These results indicate that the Mo<sub>2</sub>C nanocrystals dominate the HER activity, and the effect of the slight nitrogen concentration difference in graphene on the activity can be entirely ignored.

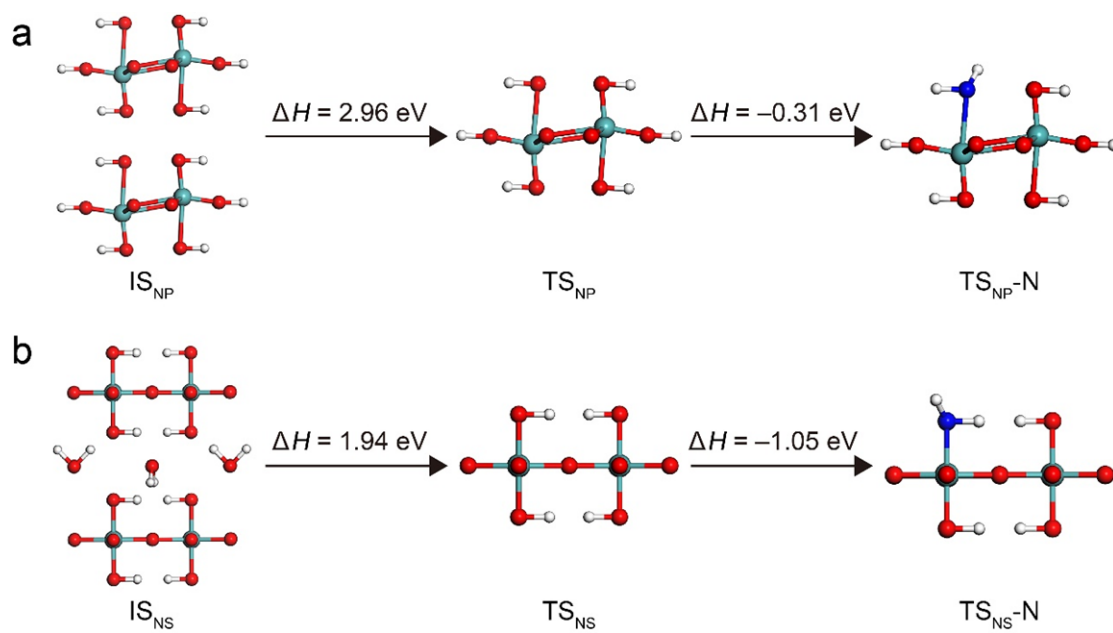

**Supplementary Fig. 23. Calculated reaction  $\Delta H$  of ammonia reaction with  $MoO_3$  **a** without and **b** with water. The cyan, dark gray, red, blue, and white balls represent Mo, C, O, N, and H atoms, respectively.**

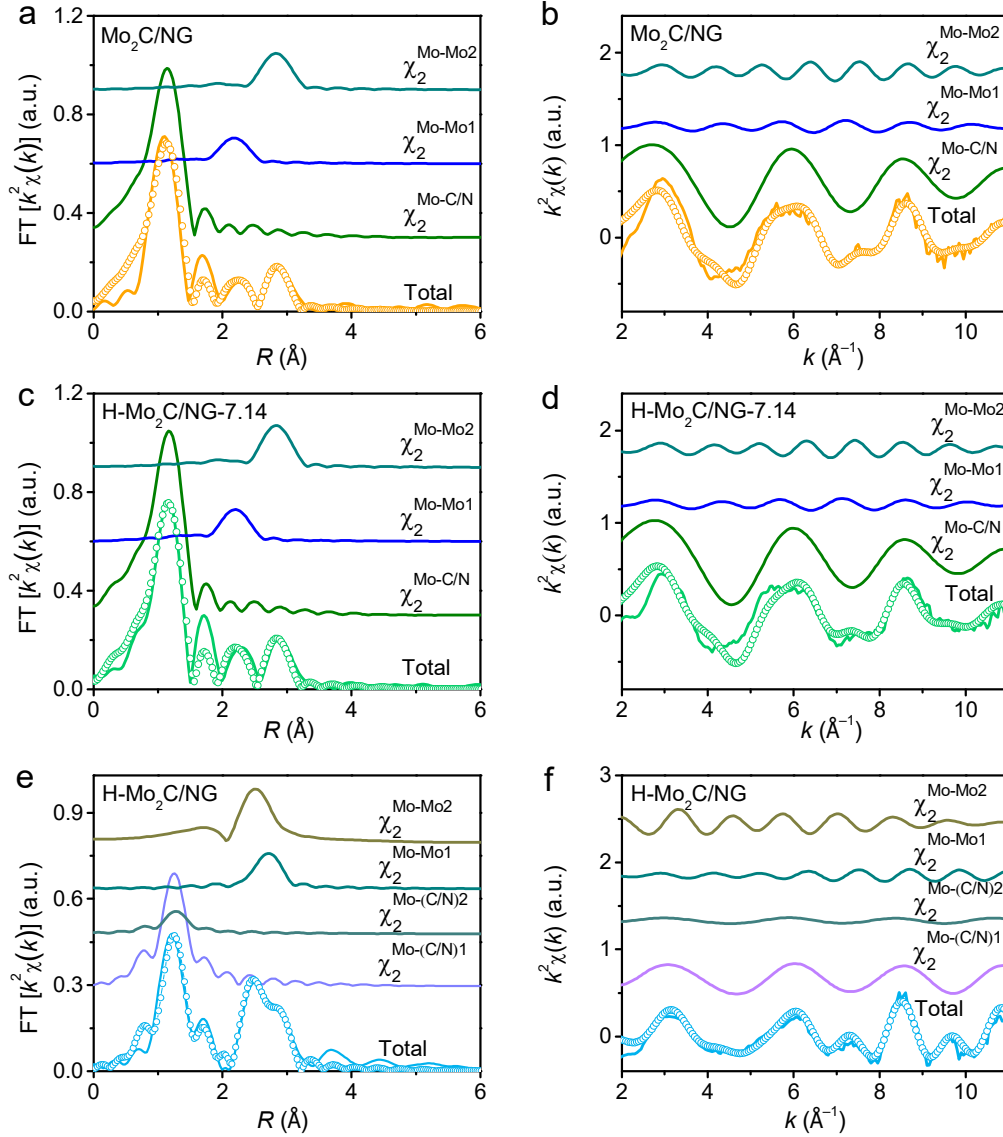

**Supplementary Fig. 24. EXAFS fitting curves of Mo<sub>2</sub>C hybrids at a, c, e *R*-space and b, d, f *k*-space. a, b Mo<sub>2</sub>C/NG, c, d H-Mo<sub>2</sub>C/NG-7.14, and e, f H-Mo<sub>2</sub>C/NG. In H-Mo<sub>2</sub>C/NG, Mo atoms have two coordination interactions of Mo–(C/N)1 (1.78 Å) and Mo–(C/N)2 (1.86 Å), and the corresponding CN values are estimated to be 1.1 and 1.6, respectively (Supplementary Table 1). While Mo atoms in H-Mo<sub>2</sub>C/NG-7.14 and Mo<sub>2</sub>C/NG have only one coordination path of Mo–C/N (1.83 and 1.85 Å) with CN of 2.8 and 3.2, respectively. The CN of Mo–C/N in H-Mo<sub>2</sub>C/NG is 2.7, which is slightly lower than those of H-Mo<sub>2</sub>C/NG-7.14 (CN = 2.8) and Mo<sub>2</sub>C/NG (CN = 3.2),**

confirming that water induces low coordination Mo atoms in Mo<sub>2</sub>C NSs. The CN values of Mo–Mo in H-Mo<sub>2</sub>C/NG (CN = 3.8), H-Mo<sub>2</sub>C/NG-7.14 (CN = 3.2), and Mo<sub>2</sub>C/NG (CN = 3.3) are close, but much lower than that of bulk Mo<sub>2</sub>C (CN = 12), which can be attributed to the high-angle GBs in ultrathin Mo<sub>2</sub>C NSs and the high dispersion of small-sized Mo<sub>2</sub>C NPs<sup>10</sup>. In a typical water-assisted carbonization process, the construction of ultrathin Mo<sub>2</sub>C NSs is in carbon-rich environment, however, due to the lattice distortion of Mo<sub>2</sub>C nanodomains near GBs, Mo atoms at GBs tend to be coordinately unsaturated.



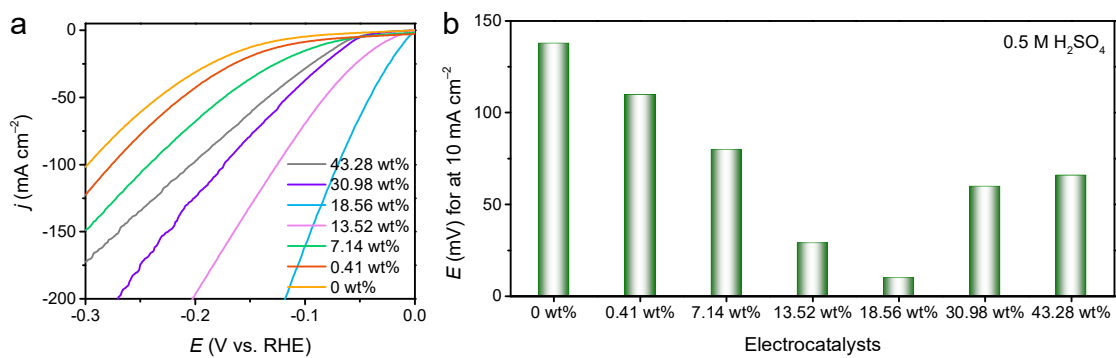

**Supplementary Fig. 25. Effects of the water content in MoO<sub>3</sub>/RGO on HER activity of Mo<sub>2</sub>C hybrids in 0.5 M H<sub>2</sub>SO<sub>4</sub>. The **a** polarization curves and **b**  $\eta_{10}$ .**

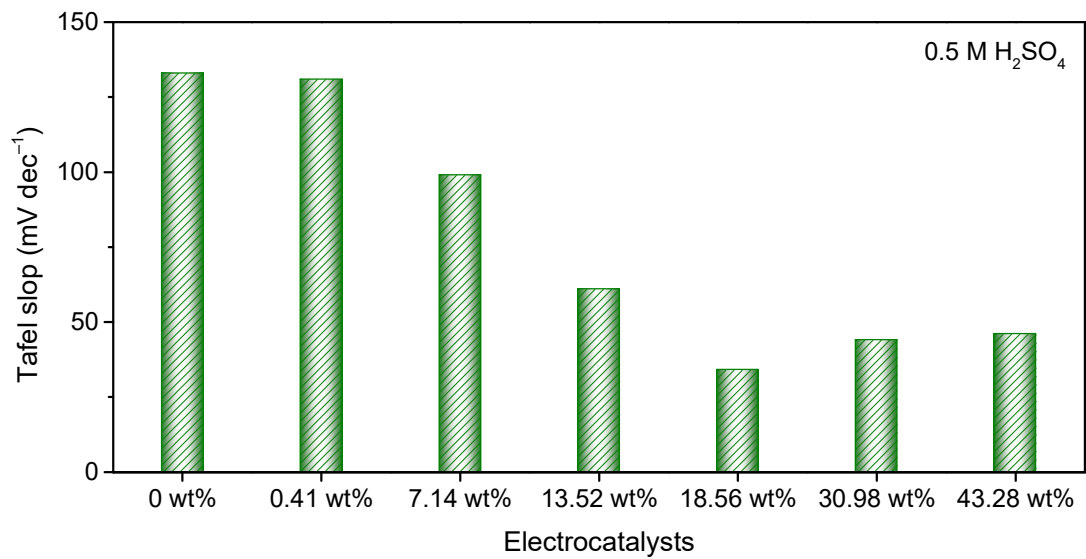

**Supplementary Fig. 26. The Tafel slopes of Mo<sub>2</sub>C hybrids in 0.5 M H<sub>2</sub>SO<sub>4</sub>.**

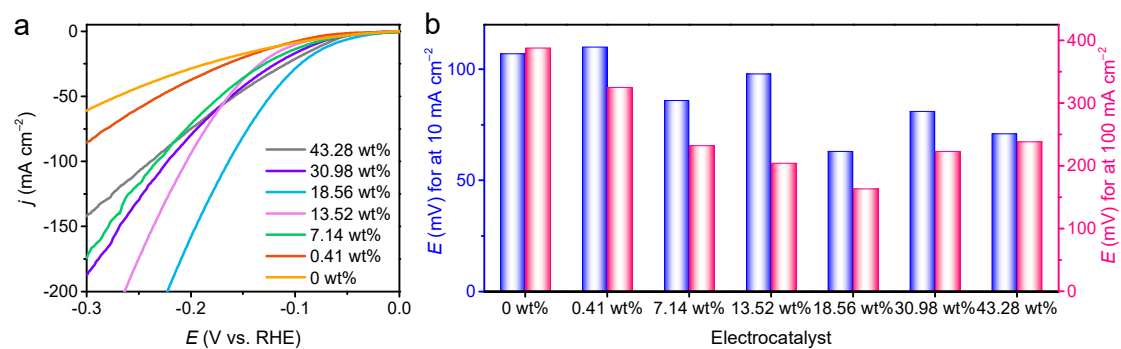

**Supplementary Fig. 27. Effects of the water content in  $\text{MoO}_3/\text{RGO}$  on HER activity of  $\text{Mo}_2\text{C}$  hybrids in 1.0 M KOH. The **a** polarization curves and **b**  $\eta_{10}$ .**

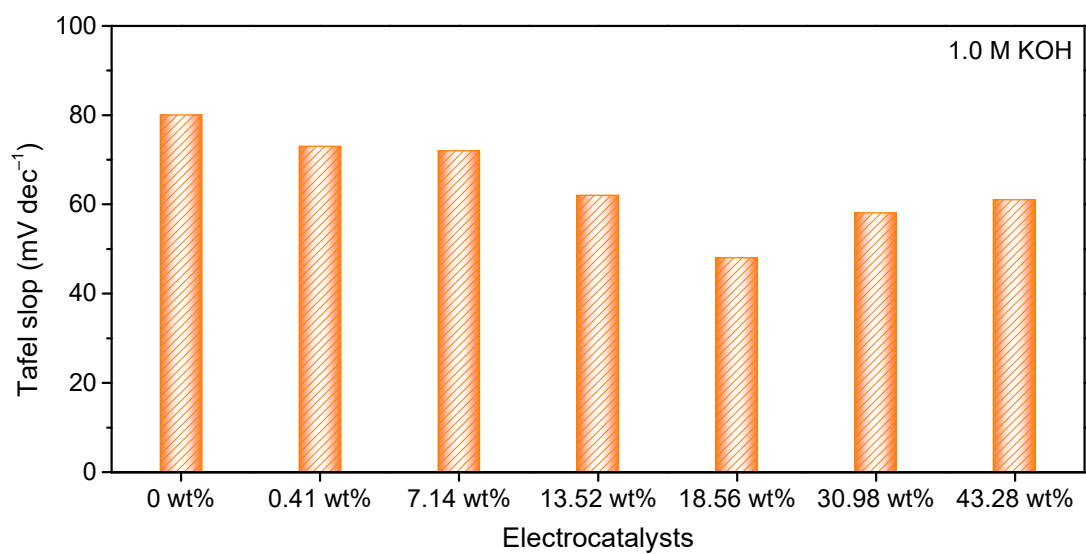

**Supplementary Fig. 28. The Tafel slopes of Mo<sub>2</sub>C hybrids in 1.0 M KOH.**

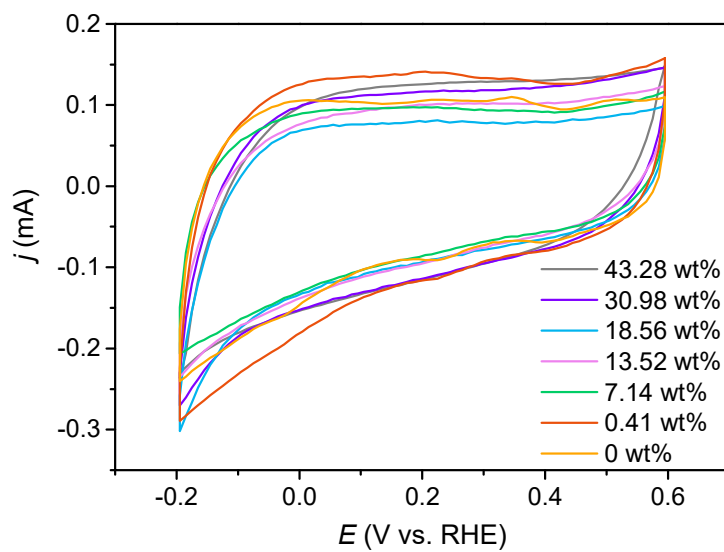

**Supplementary Fig. 29. CV cycles of Mo<sub>2</sub>C hybrids in PBS (pH 7).** The integrated charge of anodic curve for the whole potential range was used to estimate the number of active sites of Mo<sub>2</sub>C hybrids.

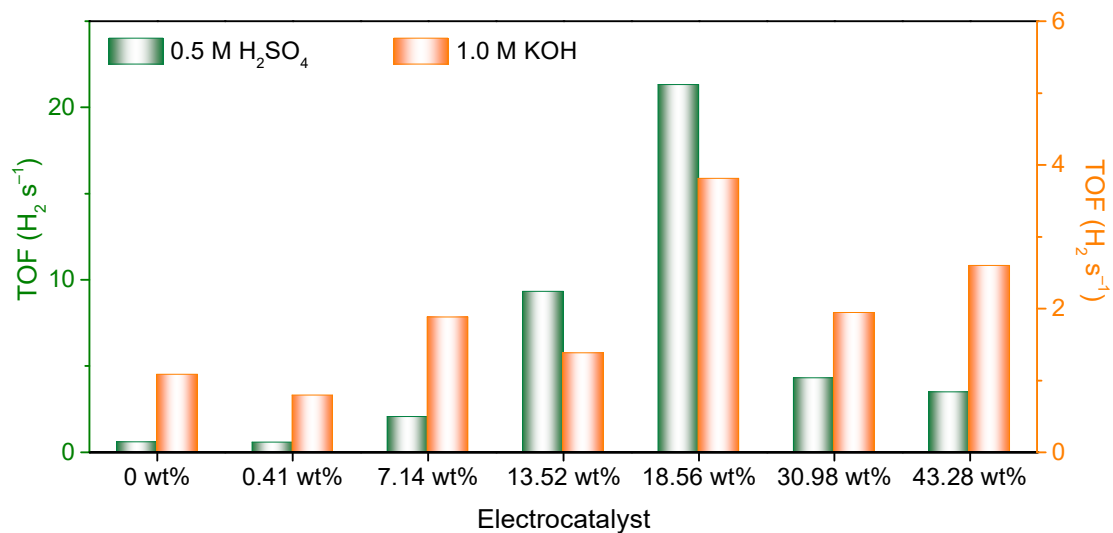

**Supplementary Fig. 30.** TOF values of Mo<sub>2</sub>C hybrids at  $\eta = 100$  mV in 0.5 M H<sub>2</sub>SO<sub>4</sub> and 1.0 M KOH.

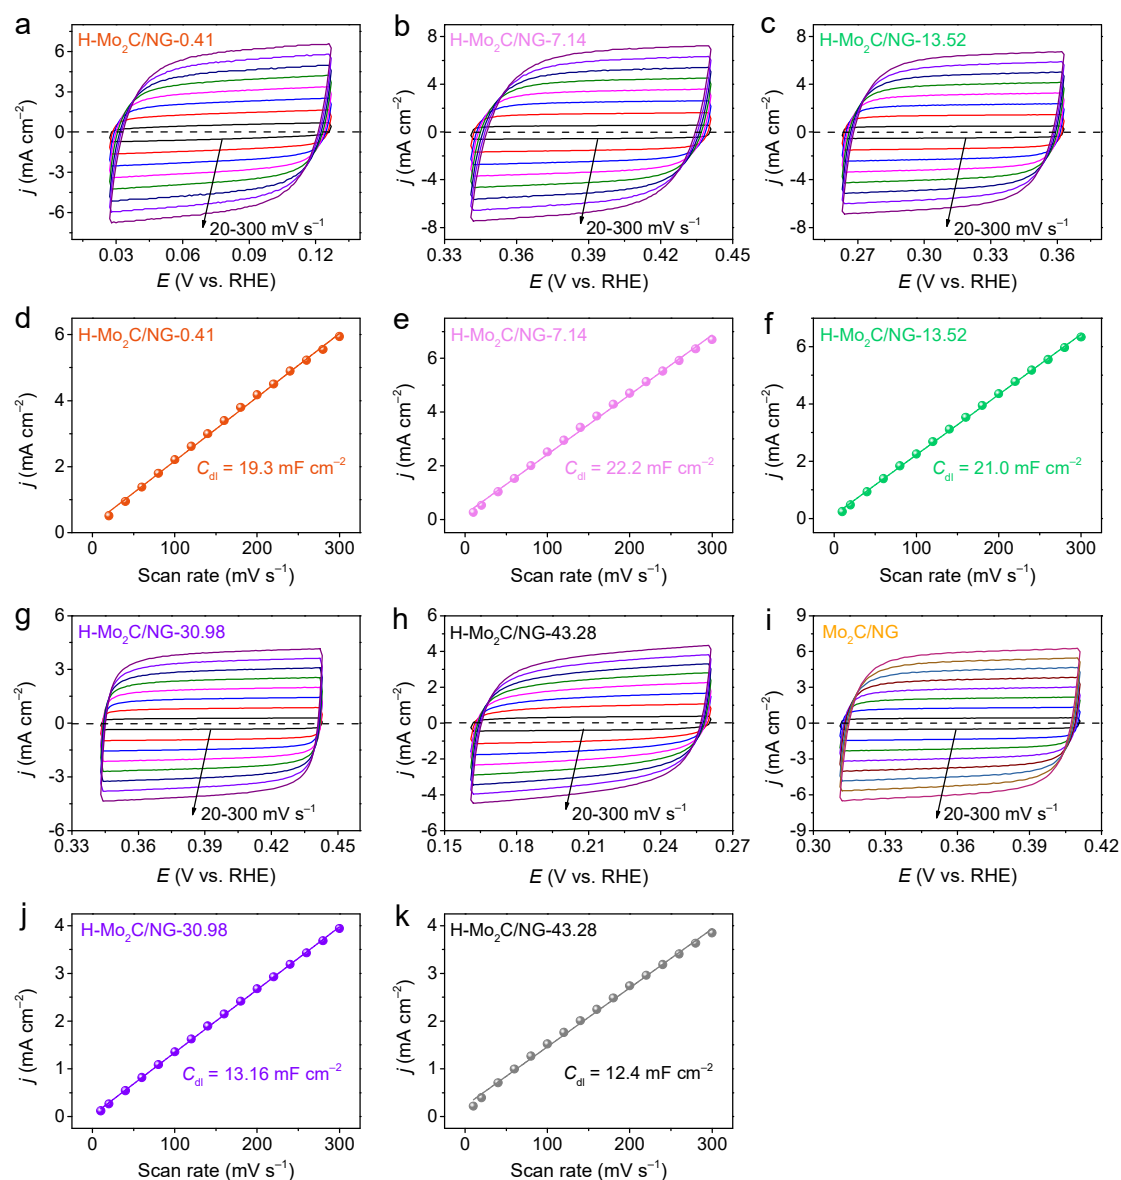

**Supplementary Fig. 31.** The CV curves with varying scan rates from 20 to 300 mV s<sup>-1</sup> in 1.0 M KOH and the corresponding capacitive current as a function of scan rate images. **a, d** H-Mo<sub>2</sub>C/NG-0.41, **b, e** H-Mo<sub>2</sub>C/NG-7.14, **c, f** H-Mo<sub>2</sub>C/NG-13.52, **g, j** H-Mo<sub>2</sub>C/NG-30.98, **h, k** H-Mo<sub>2</sub>C/NG-43.28, and **i** Mo<sub>2</sub>C/NG.

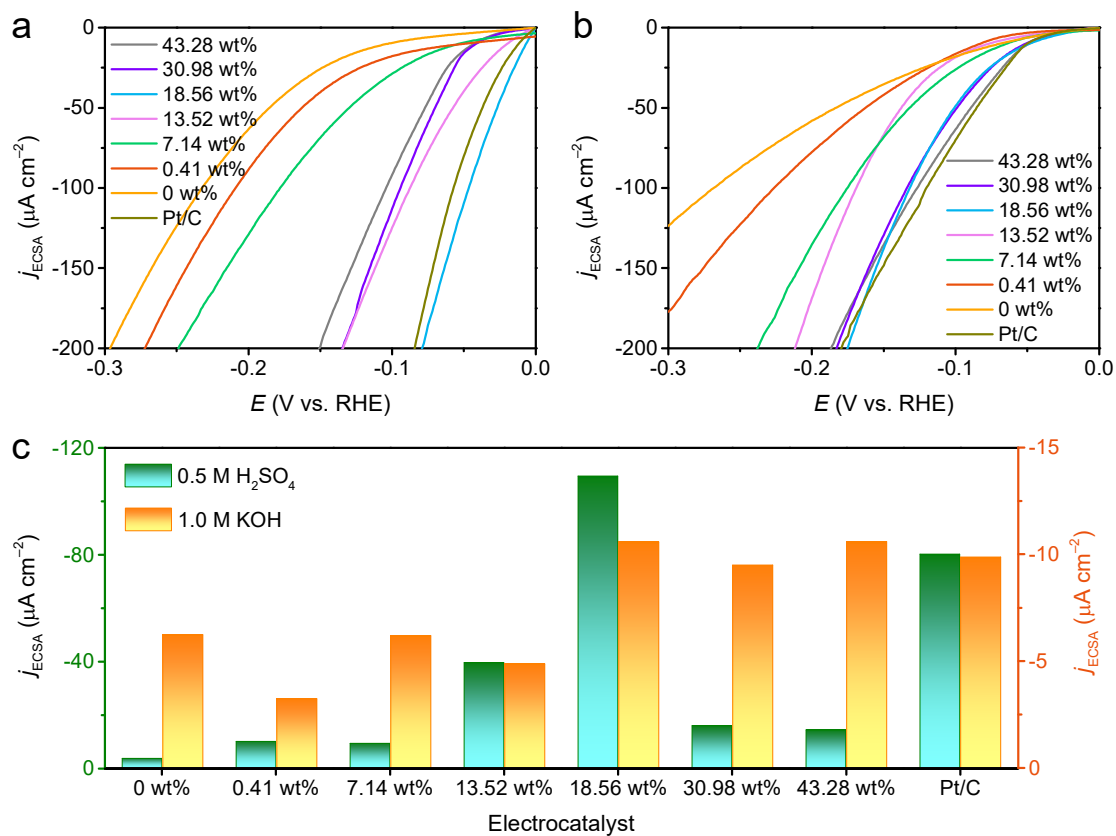

**Supplementary Fig. 32.  $j_{ECSA}$  of Mo<sub>2</sub>C hybrids. a 0.5 M H<sub>2</sub>SO<sub>4</sub> and b 1.0 M KOH. c**

$j_{ECSA}$  of Mo<sub>2</sub>C hybrids at  $\eta = 50$  mV. The ECSA of Pt/C catalyst is  $533.75 \text{ cm}^2$ <sup>11</sup>.



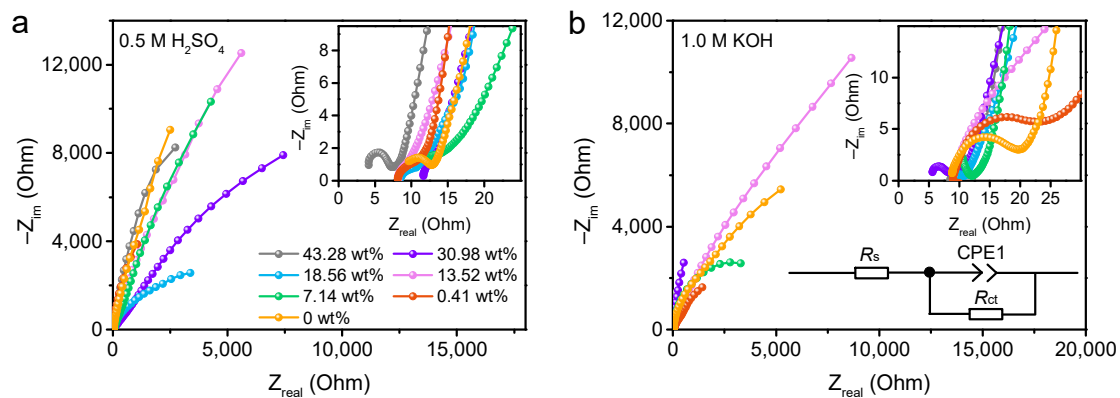

**Supplementary Fig. 33. Electrochemical impedance spectroscopy (EIS) analysis.**

The inset in panel shows the corresponding Nyquist plots at a high-frequency range in **a** 0.5 M H<sub>2</sub>SO<sub>4</sub> and **b** 1.0 M KOH. The bottom inset in **b** shows the equivalent circuit for H-Mo<sub>2</sub>C/NG electrode.  $R_s$ ,  $R_{ct}$ , and CPE1 represent the resistance of electrolyte solution, charge-transfer resistance, and chemical capacitance, respectively<sup>12</sup>.

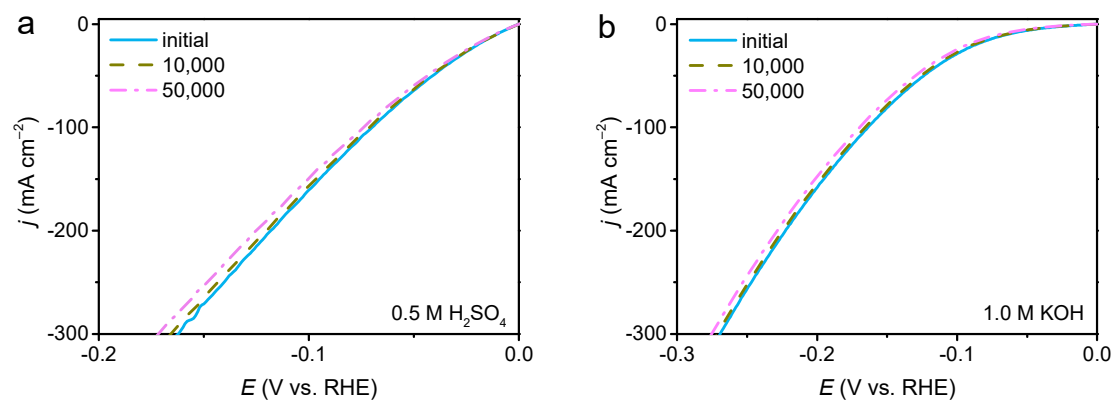

**Supplementary Fig. 34. Polarization curves recorded for H-Mo<sub>2</sub>C/NG catalyst before and after 10,000 and 50,000 potential cycles in 0.5 M H<sub>2</sub>SO<sub>4</sub> and b 1.0 M KOH.**

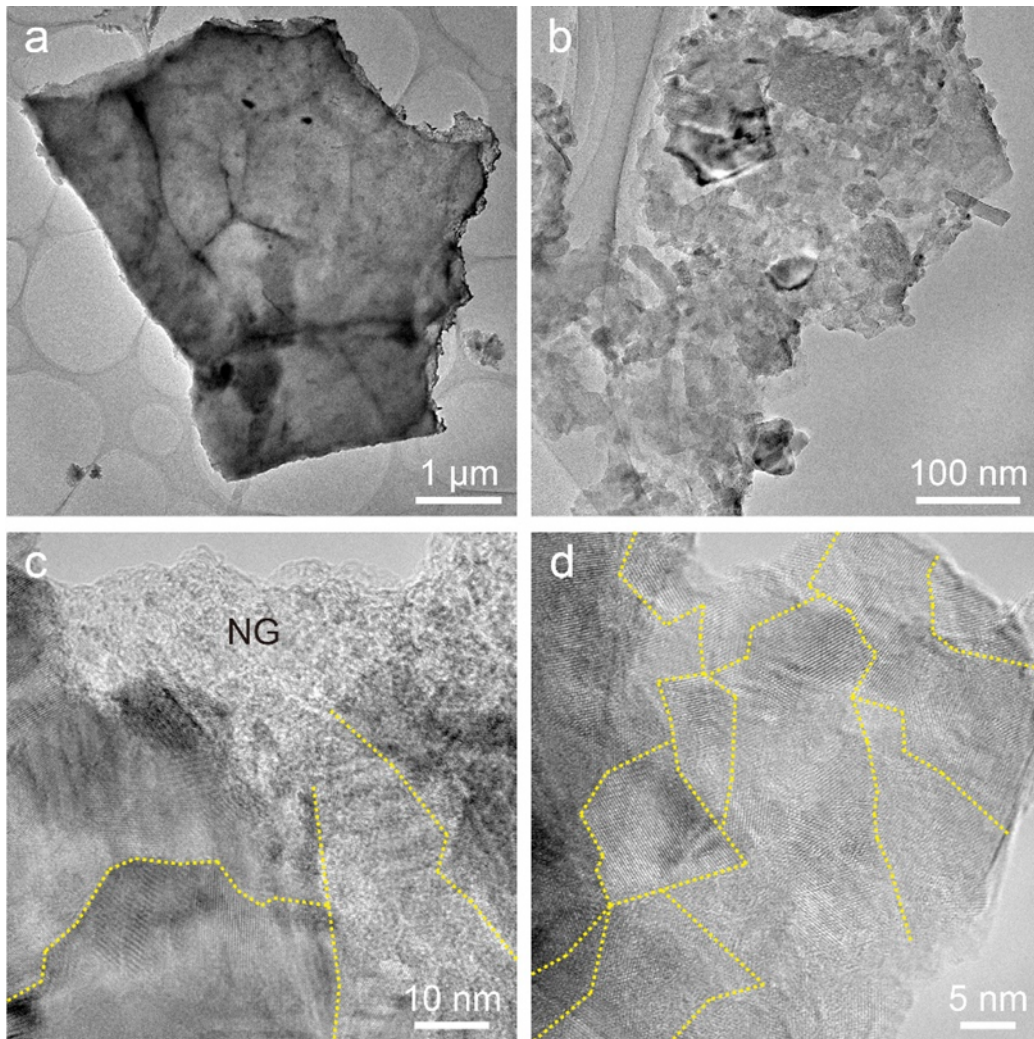

**Supplementary Fig. 35. TEM characterization of H-Mo<sub>2</sub>C/NG on CFP after cycling test.** During the HER process, the H<sub>2</sub> generated at basal-plane sites are trapped in the Mo<sub>2</sub>C layers, and then perforates or peels away the Mo<sub>2</sub>C layers to escape, resulting in thinner Mo<sub>2</sub>C NSs<sup>13</sup>.

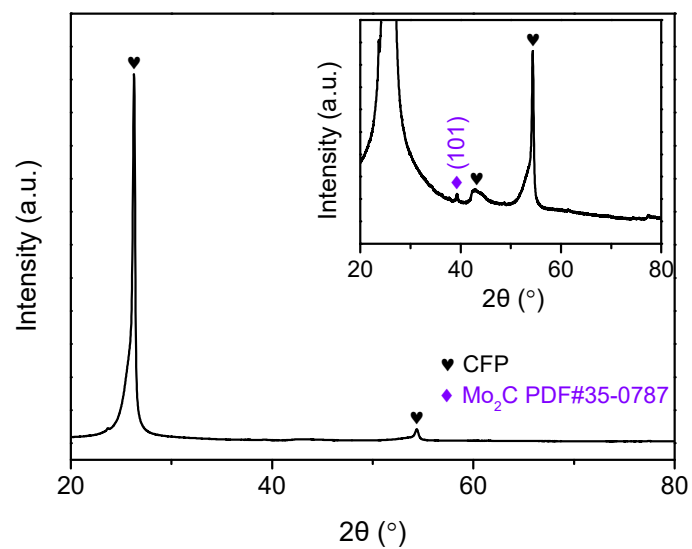

**Supplementary Fig. 36. XRD characterization of H-Mo<sub>2</sub>C/NG on CFP after cycling test.**

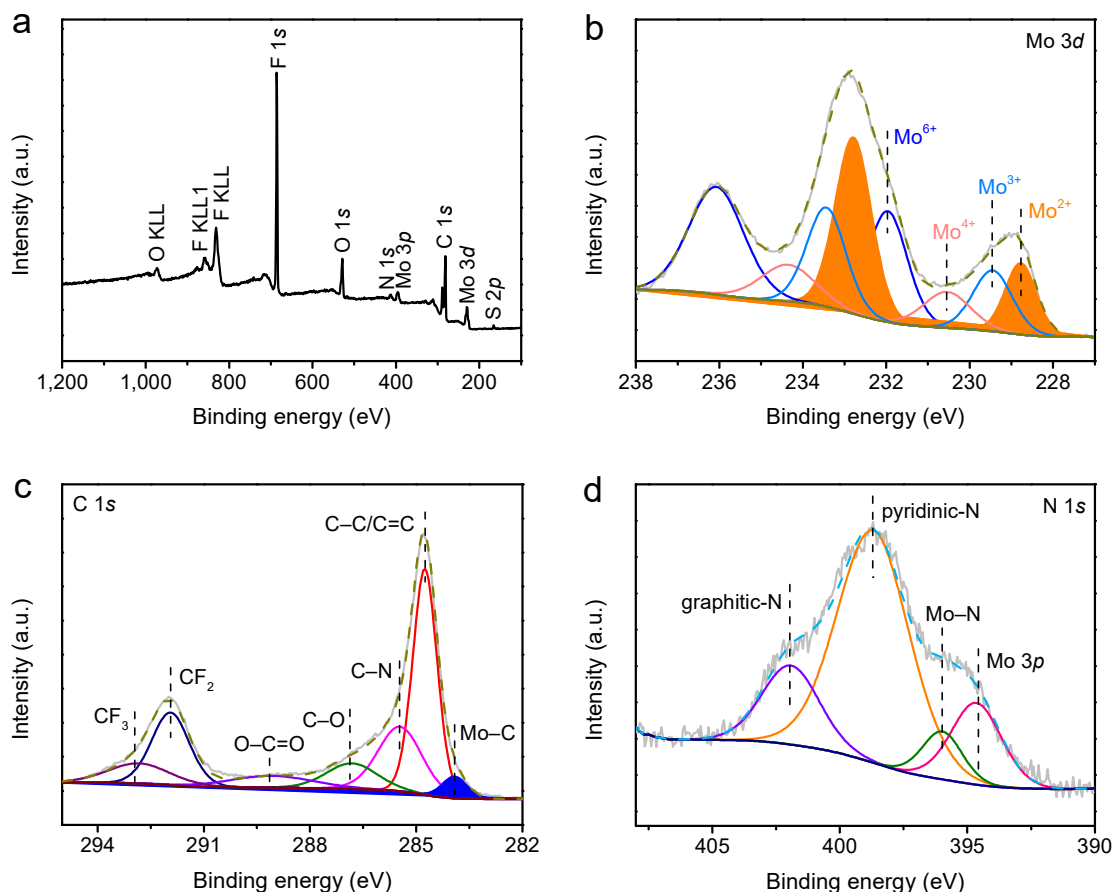

**Supplementary Fig. 37. XPS characterization of H-Mo<sub>2</sub>C/NG on CFP after cycling**

**test.** **a** XPS survey, high resolution XPS spectra of **b** Mo 3*d*, **c** C 1*s*, and **d** N 1*s*. The Mo 3*d* spectrum is deconvoluted into four pairs peaks of Mo<sup>2+</sup>, Mo<sup>3+</sup>, Mo<sup>4+</sup>, and Mo<sup>6+</sup> species. The Mo<sup>2+</sup> is from carbides, and Mo<sup>3+</sup> is assigned as nitrides; the Mo<sup>4+</sup> and Mo<sup>6+</sup> can be ascribed to molybdenum oxides species. Deconvolution of the C 1*s* spectrum reveals the presence of Mo–C (283.9 eV), C–C/C=C (284.7 eV), C–N (285.5 eV), and O=C–O (289.2 eV) bonds, as well as the CF<sub>2</sub> (291.9) and CF<sub>3</sub> (292.9 eV) species in Nafion introduced during the electrochemical test<sup>14</sup>.

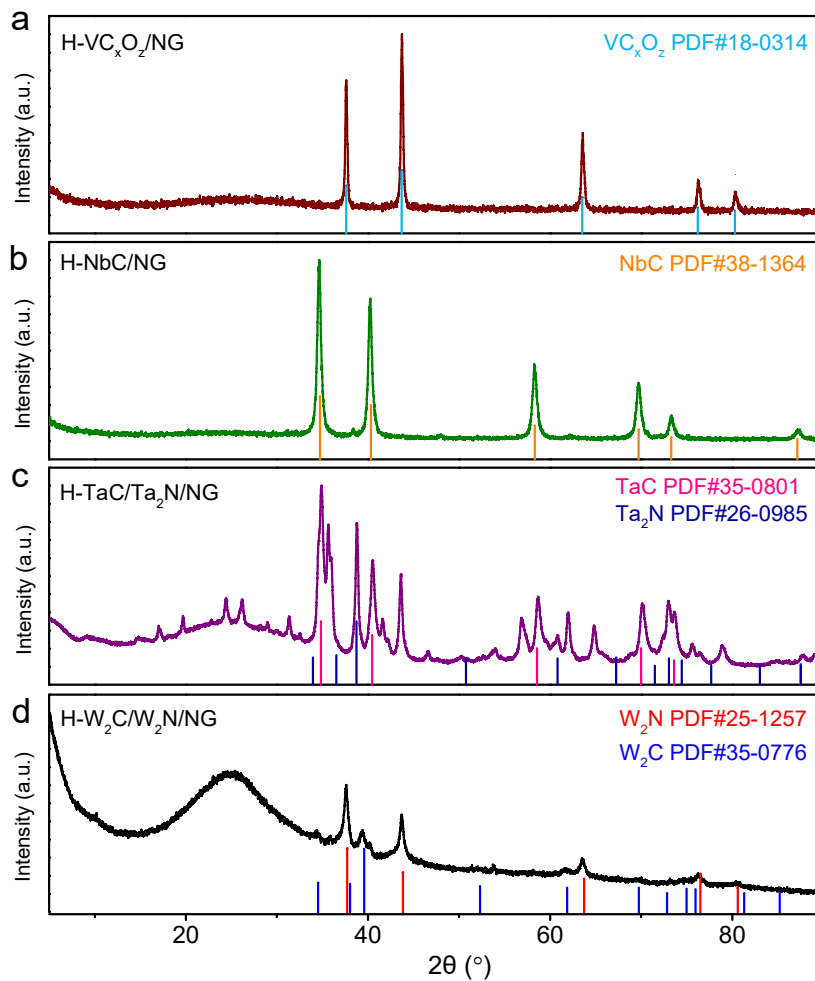

**Supplementary Fig. 38. XRD characterization. a** H- $VC_xO_z/NG$ , **b** H-NbC/NG, **c** H-TaC/Ta<sub>2</sub>N/NG, and **d** H-W<sub>2</sub>C/W<sub>2</sub>N/NG.

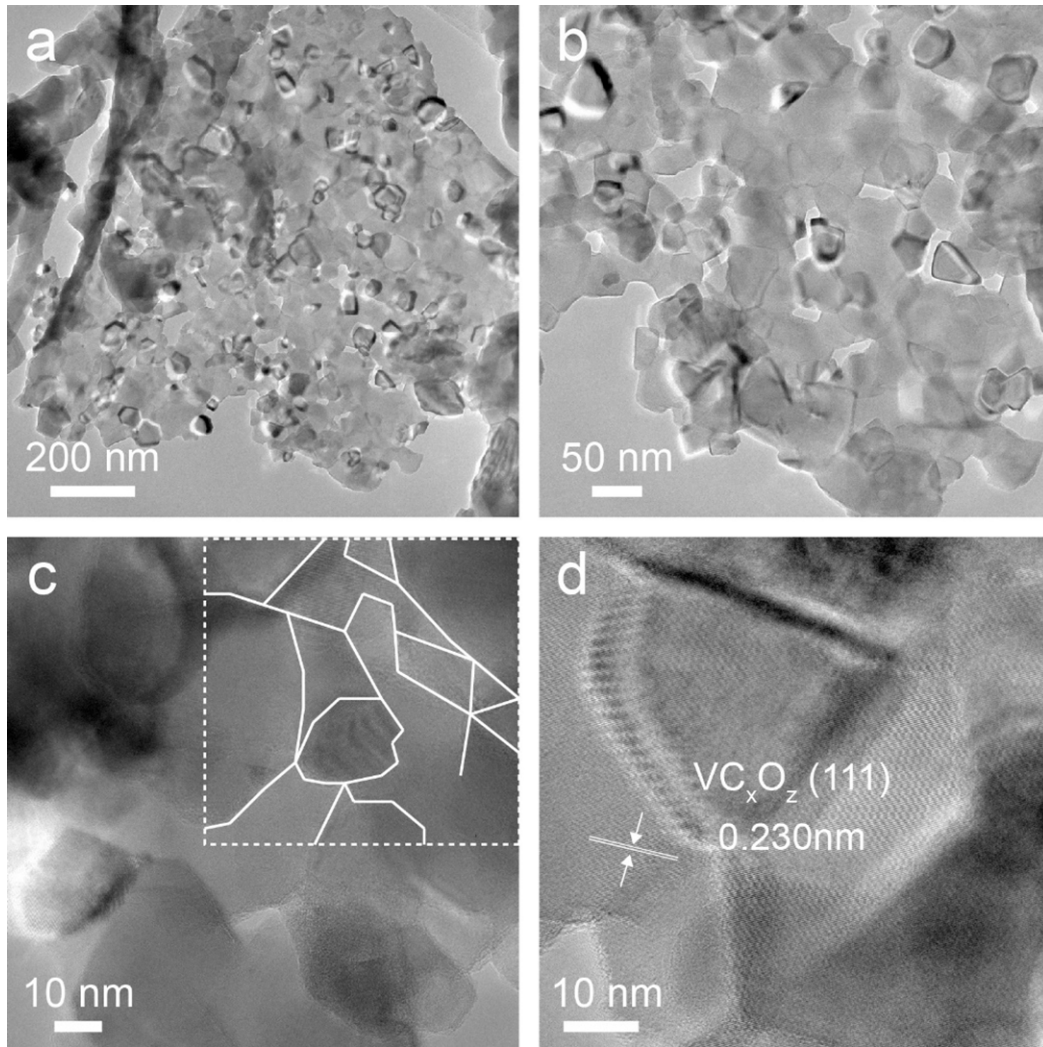

**Supplementary Fig. 39. TEM characterization of H-VC<sub>x</sub>O<sub>z</sub>/NG.** The solid lines in boxed region in **c** point out the irregular GBs.

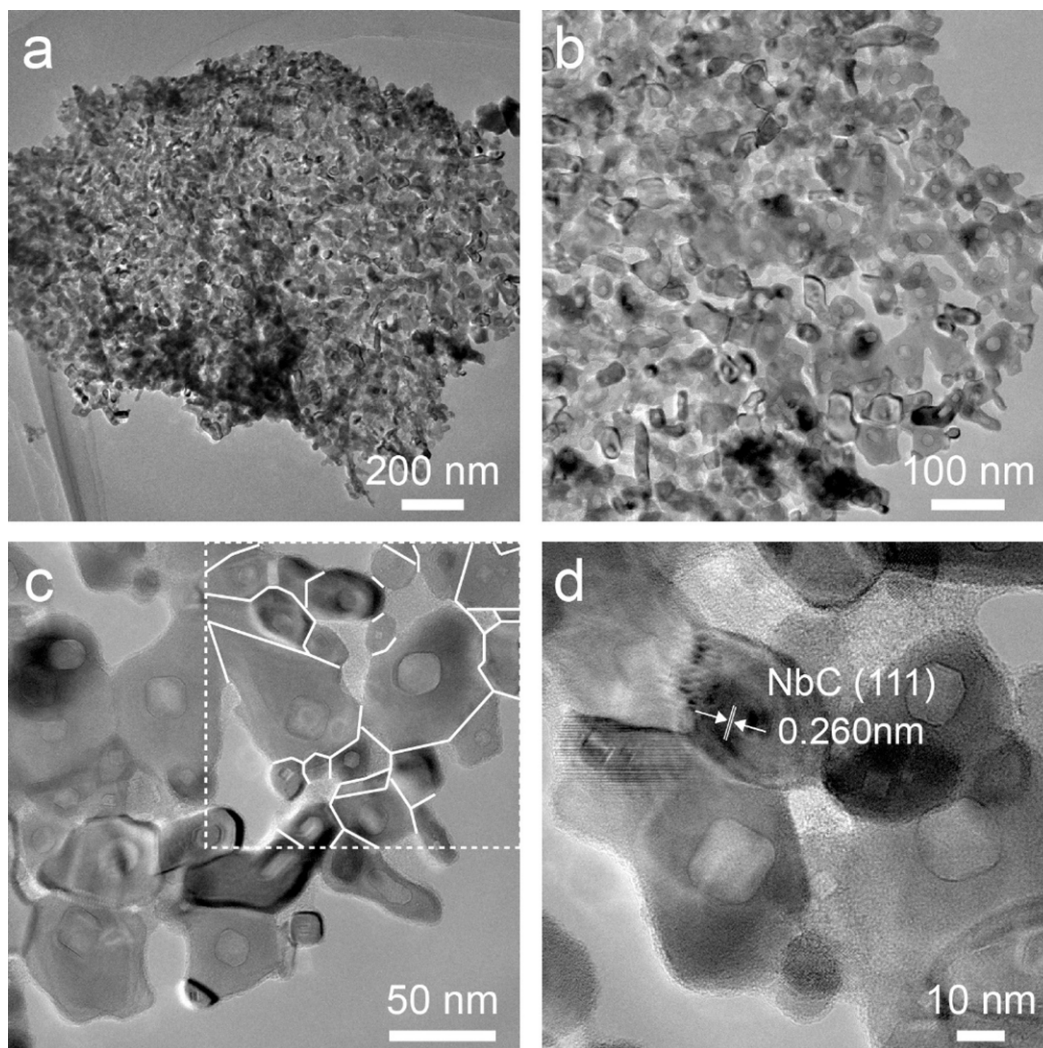

**Supplementary Fig. 40. TEM characterization of H-NbC/NG.** The solid lines in boxed region in **c** point out the irregular GBs.



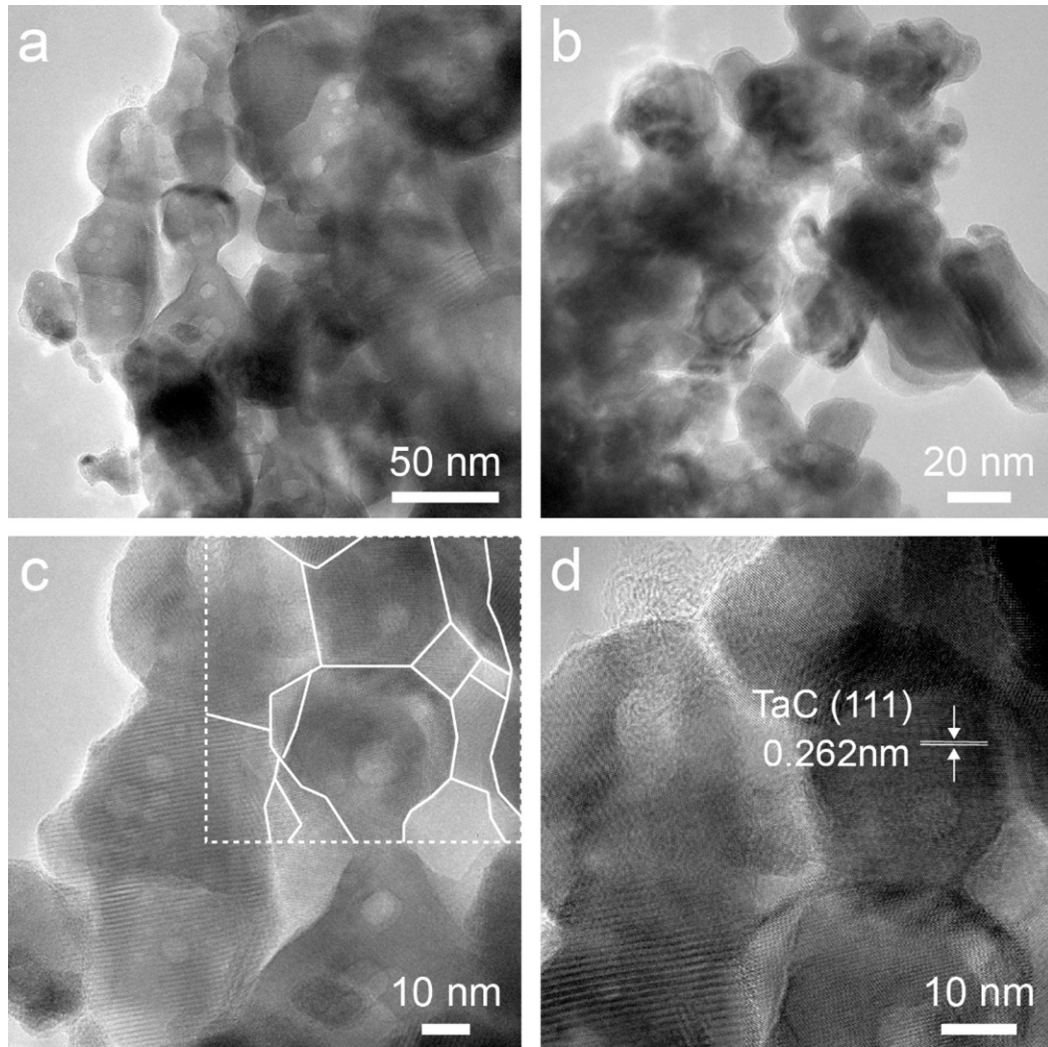

**Supplementary Fig. 41. TEM characterization of H-TaC/Ta<sub>2</sub>N/NG.** The solid lines in boxed region in **c** point out the irregular GBs.

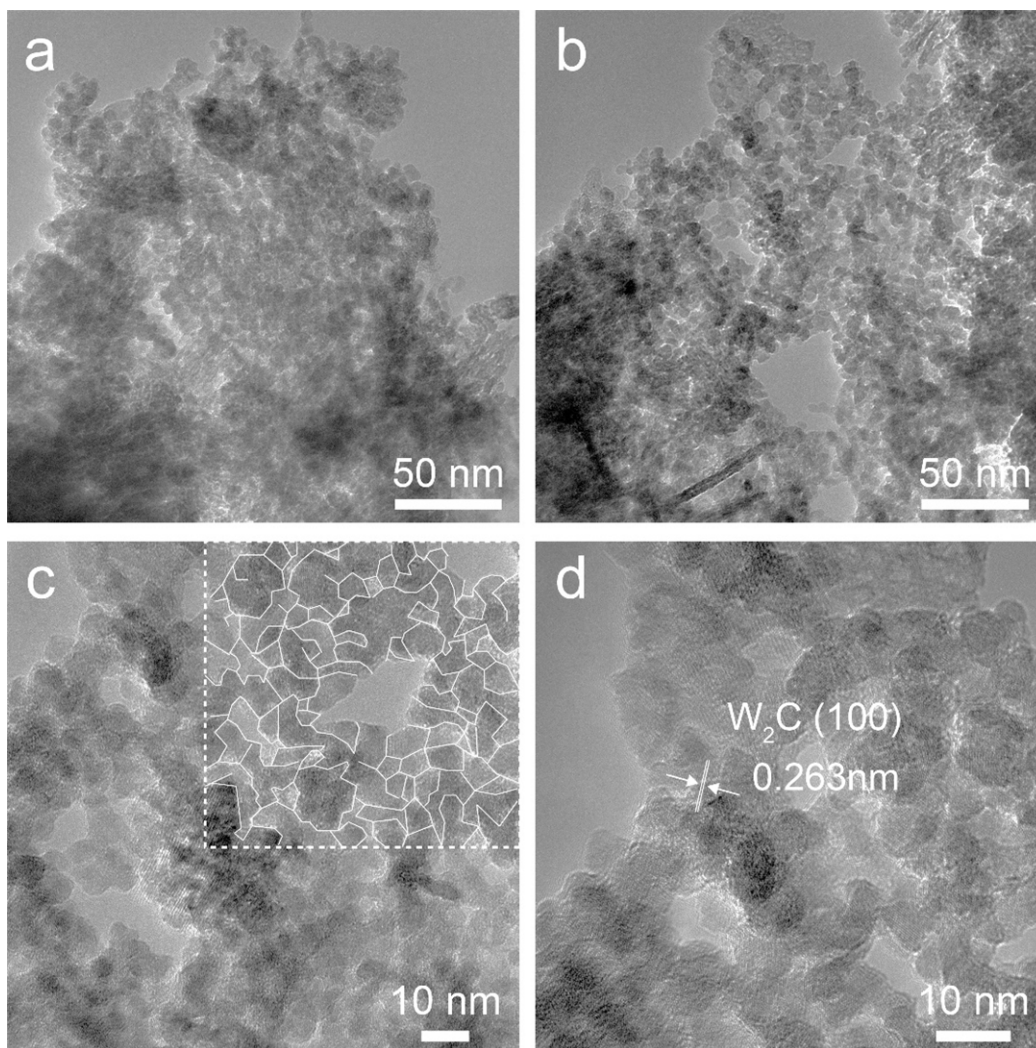

**Supplementary Fig. 42. TEM characterization of H-W<sub>2</sub>C/W<sub>2</sub>N/NG.** The solid lines in boxed region in **c** point out the irregular GBs.

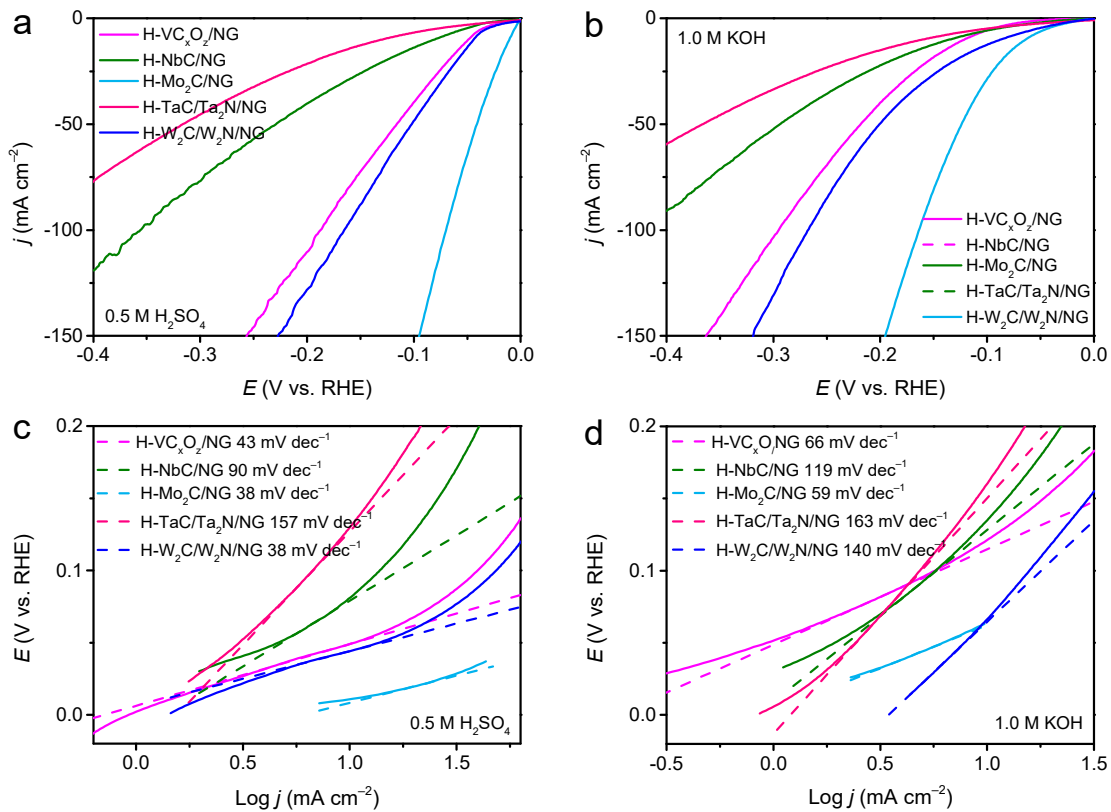

**Supplementary Fig. 43. HER performance.** a, b The polarization curves and the relevant c, d Tafel plots of H-VC<sub>x</sub>O<sub>z</sub>/NG, H-NbC/NG, H-Mo<sub>2</sub>C/NG, H-TaC/Ta<sub>2</sub>N/NG, and H-W<sub>2</sub>C/W<sub>2</sub>N/NG in a, c 0.5 M H<sub>2</sub>SO<sub>4</sub> and b, d 1.0 M KOH, respectively.

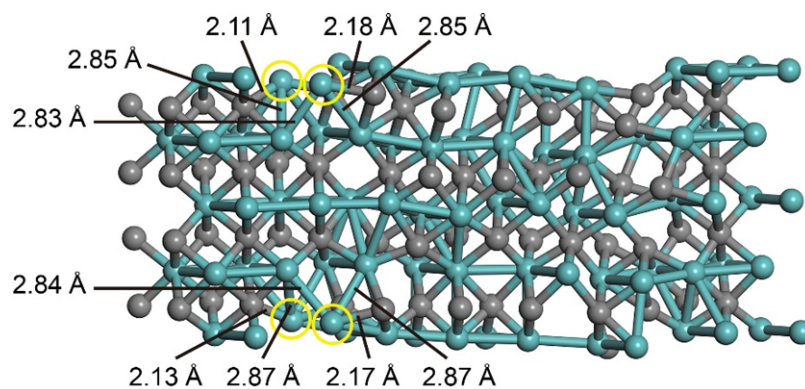

**Supplementary Fig. 44. Atomic structure of fcc/hcp GB.** Mo atoms with optimized  $H_{\text{ads}}$  at fcc/hcp GB are highlighted by yellow circles. The cyan and dark gray balls represent Mo and C atoms, respectively. The vicinity of the fcc/hcp GB exhibits optimal H adsorption free energies (such as  $-0.005$ ,  $-0.010$ ,  $-0.013$ , and  $0.058$  eV), which are superior to those of the sites far from the GBs (such as  $-0.324$ ,  $-0.358$ ,  $-0.428$ , and  $-0.517$  eV) (Fig. 6e).

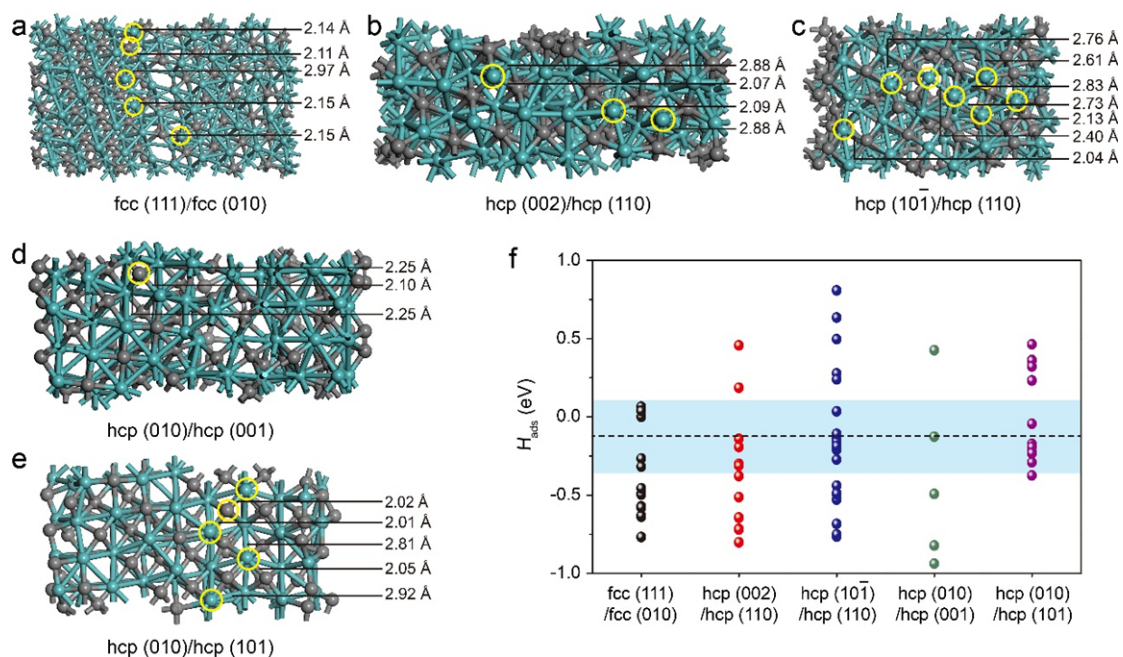

**Supplementary Fig. 45. Atomic structure of fcc/fcc and hcp/hcp GBs. a** fcc/fcc and **b-e** hcp/hcp GBs. **f**  $H_{\text{ads}}$  diagram. The dashed line is the  $H_{\text{ads}}$  of Pt (111) (-0.121 eV). The data points in the shaded area in **f** are generated using the adsorption sites indicated by the yellow circles. The cyan and dark gray balls represent Mo and C atoms, respectively.



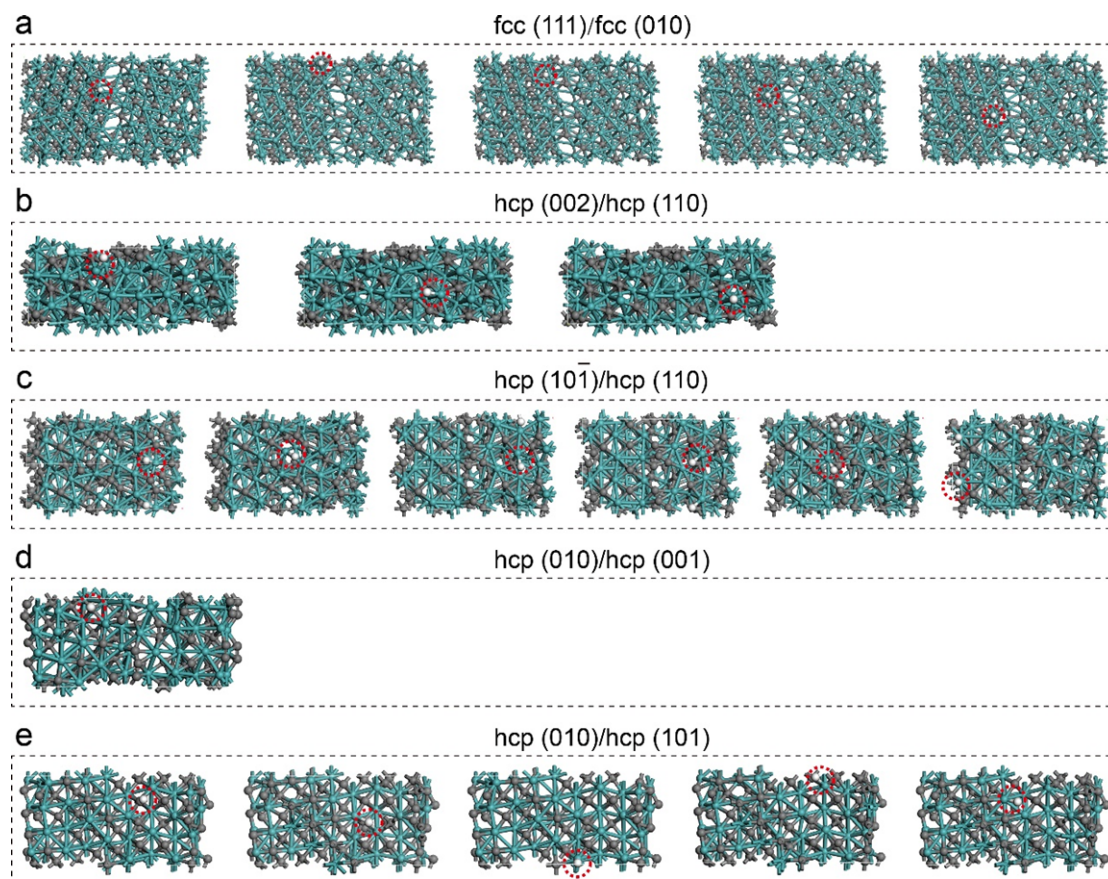

**Supplementary Fig. 46. Chemisorption models of the H intermediate in fcc/fcc and hcp/hcp GBs.** Mo and C atoms with optimized  $H_{\text{ads}}$  are highlighted by red dotted circles. The cyan, dark gray, and white balls represent Mo, C, and H atoms, respectively.

## Supplementary Tables

**Supplementary Table 1.** The Mo *K*-edge EXAFS curve fitting parameters<sup>a</sup>.

| Catalysts                                | Path      | CN  | <i>R</i> (Å) | $\sigma^2$ ( $\times 10^{-3}$ Å <sup>2</sup> ) | $\Delta E_0$ (eV) | <i>R</i> , % |
|------------------------------------------|-----------|-----|--------------|------------------------------------------------|-------------------|--------------|
| Mo foil <sup>b</sup>                     | Mo–Mo1    | 12  | 2.85         | 3.1                                            | 0.6               | 0.01         |
| MoO <sub>3</sub> <sup>c</sup>            | Mo–O1     | 3   | 1.77         | 4.0                                            | 0.3               | 0.01         |
|                                          | Mo–O2     | 3   | 2.13         | 6.3                                            |                   |              |
| H-Mo <sub>2</sub> C/NG <sup>d</sup>      | Mo–(C/N)1 | 1.1 | 1.78         | 4.4                                            | 8.5               | 0.3          |
|                                          | Mo–(C/N)2 | 1.6 | 1.86         | 5.0                                            |                   |              |
|                                          | Mo–Mo1    | 2.0 | 2.96         | 11.4                                           |                   |              |
|                                          | Mo–Mo2    | 1.8 | 3.10         | 4.7                                            |                   |              |
| H-Mo <sub>2</sub> C/NG-7.14 <sup>d</sup> | Mo–Mo1    | 1.8 | 2.88         | 5.3                                            | 6.4               | 0.2          |
|                                          | Mo–Mo2    | 1.4 | 3.17         | 9.8                                            |                   |              |
|                                          | Mo–C/N    | 3.2 | 1.85         | 4.3                                            |                   |              |
| Mo <sub>2</sub> C/NG <sup>d</sup>        | Mo–Mo1    | 1.9 | 2.87         | 6.3                                            | 7.8               | 0.2          |
|                                          | Mo–Mo2    | 1.4 | 3.20         | 10.4                                           |                   |              |

<sup>a</sup>CN, coordination number; *R*, distance between absorber and backscatter atoms;  $\sigma^2$ , Debye–Waller factor to account for both thermal and structural disorders;  $\Delta E_0$ , inner potential correction; *R* factor (%) indicates the goodness of the fit. Error bounds (accuracies) that characterize the structural parameters obtained by EXAFS spectroscopy were estimated as CN  $\pm$  20%; *R*  $\pm$  1%;  $\sigma^2$   $\pm$  20%;  $\Delta E_0$   $\pm$  20%.  $S_0^2$  was fixed to 1.0. Bold numbers indicate fixed CN according to the crystal structure. <sup>b</sup>Fitting range:  $3.0 \leq k$  (/Å)  $\leq$  13.5 and  $1.4 \leq R$  (Å)  $\leq$  3.0. <sup>c</sup>Fitting range:  $2.0 \leq k$  (/Å)  $\leq$  12.5 and  $1.0 \leq R$  (Å)  $\leq$  2.0. <sup>d</sup>Fitting range:  $2.8 \leq k$  (/Å)  $\leq$  11.0 and  $1.0 \leq R$  (Å)  $\leq$  3.4.

**Supplementary Table 2.** Comparison of  $j_0$ <sup>[a]</sup> of Mo<sub>2</sub>C hybrids.

| Catalysts                    | 0.5 M H <sub>2</sub> SO <sub>4</sub> (mA cm <sup>-2</sup> ) | 1.0 M KOH (mA cm <sup>-2</sup> ) |
|------------------------------|-------------------------------------------------------------|----------------------------------|
| Mo <sub>2</sub> C/NG         | 0.80                                                        | 0.31                             |
| H-Mo <sub>2</sub> C/NG-0.41  | 1.49                                                        | 0.32                             |
| H-Mo <sub>2</sub> C/NG-7.14  | 1.55                                                        | 0.62                             |
| H-Mo <sub>2</sub> C/NG-13.52 | 3.54                                                        | 0.63                             |
| H-Mo <sub>2</sub> C/NG       | 5.47                                                        | 0.75                             |
| H-Mo <sub>2</sub> C/NG-30.98 | 0.38                                                        | 0.61                             |
| H-Mo <sub>2</sub> C/NG-43.28 | 0.39                                                        | 0.51                             |
| Pt/C                         | 2.83                                                        | 0.40                             |

[a]  $j_0$  values were calculated from Tafel curves using an extrapolation method.



**Supplementary Table 3.** Summary of HER performance of reported non-precious metal electrocatalysts in acidic conditions.

| Catalysts                                                      | $\eta_{10}$ (mV) | Tafel slope (mV dec <sup>-1</sup> ) | Electrolyte                          | Ref.      |
|----------------------------------------------------------------|------------------|-------------------------------------|--------------------------------------|-----------|
| <i>p</i> -Ni <sub>12</sub> P <sub>5</sub>                      | 27.7             | 30.88                               | 0.5 M H <sub>2</sub> SO <sub>4</sub> | 11        |
| Co-P@PC-750                                                    | 33               | 49                                  | 0.5 M H <sub>2</sub> SO <sub>4</sub> | 15        |
| Co <sub>9</sub> S <sub>8</sub> -MoS <sub>2</sub> /NF           | 250              | 79.58                               | 0.5 M H <sub>2</sub> SO <sub>4</sub> | 16        |
| Co-Fe-P nanotubes                                              | 66               | 72                                  | 0.5 M H <sub>2</sub> SO <sub>4</sub> | 17        |
| B-CoP/CNT                                                      | 39               | 50                                  | 0.5 M H <sub>2</sub> SO <sub>4</sub> | 18        |
| nano-MoC/C-Ns                                                  | 126              | 69                                  | 0.5 M H <sub>2</sub> SO <sub>4</sub> | 19        |
| Co/Ni-doped MoP                                                | 102              | 58.1                                | 0.5 M H <sub>2</sub> SO <sub>4</sub> | 20        |
| (Fe <sub>x</sub> Ni <sub>1-x</sub> ) <sub>2</sub> P nanosheets | 81               | 53.5                                | 0.5 M H <sub>2</sub> SO <sub>4</sub> | 21        |
| Co/Se-MoS <sub>2</sub> -NF                                     | 104              | 67                                  | 0.5 M H <sub>2</sub> SO <sub>4</sub> | 22        |
| Ni <sub>2</sub> P/Ni@C                                         | 149              | 61.2                                | 0.5 M H <sub>2</sub> SO <sub>4</sub> | 23        |
| Fe/P-CoS <sub>2</sub> PCNW                                     | 80               | 56                                  | 0.5 M H <sub>2</sub> SO <sub>4</sub> | 24        |
| Cu@MoS <sub>2</sub>                                            | 92               | 50.5                                | 0.5 M H <sub>2</sub> SO <sub>4</sub> | 25        |
| FePSe <sub>3</sub> /NC                                         | 80               | 53                                  | 0.5 M H <sub>2</sub> SO <sub>4</sub> | 26        |
| Mo <sub>2</sub> C-MoO <sub>x</sub> /CC                         | 60               | 53                                  | 1.0 M HClO <sub>4</sub>              | 27        |
| PHA-Mo <sub>2</sub> C                                          | 93               | 47.3                                | 0.5 M H <sub>2</sub> SO <sub>4</sub> | 28        |
| Mo <sub>2</sub> C@BNC                                          | 184              | 68.3                                | 0.5 M H <sub>2</sub> SO <sub>4</sub> | 29        |
| H-Mo <sub>2</sub> C/NG                                         | 10               | 38                                  | 0.5 M H <sub>2</sub> SO <sub>4</sub> | This work |

**Supplementary Table 4.** Summary of HER performance of reported non-precious metal electrocatalysts in alkaline conditions.

| Catalysts                                                      | $\eta_{10}$ (mV) | Tafel slope (mV dec <sup>-1</sup> ) | Electrolytes | Ref.      |
|----------------------------------------------------------------|------------------|-------------------------------------|--------------|-----------|
| Co-P@PC-750                                                    | 76               | 50                                  | 1.0 M KOH    | 13        |
| Co <sub>9</sub> S <sub>8</sub> -MoS <sub>2</sub> /NF           | 110              | 81.7                                | 1.0 M KOH    | 16        |
| Co-Fe-P nanotubes                                              | 86               | 66                                  | 1.0 M KOH    | 17        |
| B-CoP/CNT                                                      | 56               | 69                                  | 0.1 M KOH    | 18        |
| nano-MoC/C-Ns                                                  | 92               | 73                                  | 0.1 M KOH    | 19        |
| (Fe <sub>x</sub> Ni <sub>1-x</sub> ) <sub>2</sub> P nanosheets | 103              | 76.6                                | 1.0 M KOH    | 21        |
| Cu@WC                                                          | 119              | 88.9                                | 1.0 M KOH    | 25        |
| Mo <sub>2</sub> C@BNC                                          | 145              | 57.4                                | 1.0 M KOH    | 29        |
| CoP/NiCoP NTs                                                  | 133              | 88                                  | 1.0 M KOH    | 30        |
| Ni <sub>3</sub> (Ni <sub>3</sub> -HAHATN) <sub>2</sub>         | 115              | 45.6                                | 0.1 M KOH    | 31        |
| Edge-MoS <sub>2</sub> /Co <sub>3</sub> S <sub>4</sub> @NFs     | 90.3             | 61.69                               | 1.0 M KOH    | 32        |
| Ni <sub>1</sub> Co <sub>1</sub> -P                             | 169              | 68                                  | 1.0 M KOH    | 33        |
| CoMo <sub>2</sub> S <sub>4</sub>                               | 55               | 59.6                                | 1.0 M NaOH   | 34        |
| MoS <sub>2</sub> -Mo <sub>2</sub> C                            | 56               | 64.2                                | 1.0 M KOH    | 35        |
| N-NiMoS                                                        | 68               | 86                                  | 1.0 M KOH    | 36        |
| NiSe <sub>2</sub> @NC                                          | 162              | 88                                  | 1.0 M KOH    | 37        |
| H-Mo <sub>2</sub> C/NG                                         | 63               | 59                                  | 1.0 M KOH    | This work |

**Supplementary Table 5.** The content of molybdenum in Mo<sub>2</sub>C hybrids measured by inductively coupled plasma mass spectrometry (ICP-MS).

| Catalysts                    | Mo (wt%) |
|------------------------------|----------|
| Mo <sub>2</sub> C/NG         | 8.28     |
| H-Mo <sub>2</sub> C/NG-0.41  | 7.14     |
| H-Mo <sub>2</sub> C/NG-7.14  | 8.07     |
| H-Mo <sub>2</sub> C/NG-13.52 | 8.07     |
| H-Mo <sub>2</sub> C/NG       | 7.98     |
| H-Mo <sub>2</sub> C/NG-43.28 | 8.03     |

## **Supplementary Notes**

### **Supplementary Note 1**

To fully understand the growth behavior of Mo<sub>2</sub>C, Mo<sub>2</sub>C hybrids obtained with various water contents were carefully studied by TEM characterization. With the increase of water content, the structure of Mo<sub>2</sub>C evolves from NPs (Mo<sub>2</sub>C/NG) (Supplementary Fig. 2) to discontinuous NSs (H-Mo<sub>2</sub>C/NG-7.14) (Supplementary Fig. 16), then to continuous NSs with rich GBs (H-Mo<sub>2</sub>C/NG) (Supplementary Fig. 17), and finally to layered stacked sheets (H-Mo<sub>2</sub>C/NG-43.28) (Supplementary Fig. 18). This result indicates that the morphological structure and chemical distribution of Mo<sub>2</sub>C are sensitive to water.

## Supplementary Note 2

To investigate the role of  $\text{NH}_3$  in the formation of  $\text{Mo}_2\text{C}$  NSs with rich GBs, the same procedure of H- $\text{Mo}_2\text{C}/\text{NG}$  without  $\text{NH}_3$  is carried out to obtain molybdenum composites. XRD result shows that Mo- $\text{Mo}_2\text{C}$  heterostructures are formed when there is no  $\text{NH}_3$  during carbothermal reaction (Supplementary Fig. 10), indicating that  $\text{NH}_3$  is essential for harvesting pure  $\text{Mo}_2\text{C}$  crystalline phase. The incomplete carbonization of  $\text{MoO}_3$  intermediate in the absence of  $\text{NH}_3$  possibly results from the sluggish carburation kinetics induced by the slow pyrolysis process of RGO<sup>38</sup>. When  $\text{NH}_3$  is introduced into the carbonization process, the nitrogen atoms from the pyrolysis of  $\text{NH}_3$  can be quickly supplied to the reduced molybdenum atoms<sup>39</sup>, preventing the formation of metallic molybdenum, resulting in trace nitrogen-doped  $\text{Mo}_2\text{C}$  NSs with dense GBs.

### Supplementary Note 3

To investigate the effect of surface functional groups of GO precursor on the GB density, Mo<sub>2</sub>C hybrids were prepared using GO with various oxidation levels (Supplementary Fig. 11). Using smooth graphite plates with negligible oxygen-containing functional groups as substrate for Mo<sub>2</sub>C growth, the obtained Mo<sub>2</sub>C nanocrystals are unevenly distributed and agglomerated significantly (Supplementary Fig. 12). If the GO support has a low oxidation degree, the resulting Mo<sub>2</sub>C NSs display a relatively uniform distribution with a small amount of GBs (Supplementary Fig. 13), which can be attributed to limited nucleation sites during carbothermal reaction<sup>40</sup>. The morphology of Mo<sub>2</sub>C product supported with excessively oxidized GO (Supplementary Fig. 14) is slightly agglomerated as compared with the uniformly structure of H-Mo<sub>2</sub>C/NG synthesized with common GO as substrate (Fig. 2d)<sup>2</sup>. This result can be attributed to the escape of a large number of oxygen-containing functional groups on GO during carbonization process, which severely damaged the skeleton structure, resulting in inhibiting the exposure of GBs<sup>41</sup>. Thus, the above results indicate that sufficient oxygen-containing functional groups on GO surface are necessary for the formation of high-density GBs in Mo<sub>2</sub>C NSs.

#### Supplementary Note 4

**Calculation of TOF.** The TOF is defined as follows:

$$\text{TOF} = \frac{j \times A}{2Fm} \quad (1)$$

where  $j$  is the current density ( $\text{A cm}^{-2} = \text{C s}^{-1} \text{cm}^{-2}$ ) at a specific overpotential ( $-0.2 \sim 0.6 \text{ V vs. RHE}$ ),  $A$  is the surface area of electrode ( $\text{cm}^2$ ), the factor  $1/2$  is related to the number of electrons required to generate one molecule of  $\text{H}_2$ ,  $F$  is Faraday constant ( $96485.4 \text{ C mol}^{-1}$ ) and  $m$  is the number of surfaced active sites (moles) those take part in electrochemical HER.

$$m = \frac{Q_A}{2F} \quad (2)$$

Here, the anodic charge ( $Q_A$ , Coulombs) was calculated from the anodic part of CV curves measured in PBS (pH 7) at  $50 \text{ mV s}^{-1}$  as showed in Supplementary Fig. 29.

## Supplementary Note 5

**Calculation of ECSA.** ECSA was estimated by using  $C_{dl}$  that was obtained from the linear slope of the plot between scan rate and current density measured by cyclic voltammetry (CV) curves in 1.0 M KOH. The specific capacitance for a flat surface is generally found to be in the range of 20 ~ 60  $\mu\text{F cm}^{-2}$ . Assume that the specific capacitance of a flat surface is 40  $\mu\text{F cm}^{-2}$  for 1  $\text{cm}^2$  of real surface area. ECSA was calculated by the following equation:

$$\text{ECSA} = \frac{\text{Specific capacitance (mF cm}^{-2}\text{)}}{40 \mu\text{F cm}^{-2} \text{ per cm}^2} \quad (3)$$



## Supplementary Note 6

**DFT calculations.** The first-principles calculations based on the DFT were performed within generalized gradient approximation (GGA). Core electron states were represented by the projector augmented-wave method as implemented in the Vienna ab initio simulation package (VASP). The Perdew–Burke–Ernzerhof exchange correlation functional and a plane wave representation for the wave function with a cut-off energy of 450 eV were used. During the simulation lattice parameters were fully relaxed, geometry of crystal was fully optimized on the basis of the criteria of a maximum atomic force of 0.01 eV Å<sup>-1</sup> and energy convergence criteria of 0.1 meV before the electron structure and total energy calculation. The VASPSOL<sup>42</sup> function was employed to mimic the solvation environment. 15 Å vacuum space and dipole correction were added to the 2D slab model to remove the convergence problem. Different supercells (2×2×1 to 4×4×1) were adopted during the calculation and the *k*-mesh point convergence test was conducted for each supercell. The strength of H atom binding to the surface was determined by the bond strength of the H–Mo bond, which was determined by the orbital overlap between the H and surface Mo atoms. The classical molecular orbital overlap theory was used to explain the overlap between the *d<sub>z</sub><sup>2</sup>* orbital of Mo and *s* orbital of H. Moreover, the detailed electronic structures of Mo<sub>2</sub>C hybrids were demonstrated by PDOS with the DFT calculation.

The free energy of the H adsorption was calculated as:

$$H_{\text{ads}} = E(\text{H}^*) + ZPE(\text{H}^*) - TS(\text{H}^*) - E(*) - 1/2[E(\text{H}_2) + ZPE(\text{H}_2) - TS(\text{H}_2)] \quad (4)$$

Where the star (\*) indicate the substrate, H\* means the adsorbed state.

In 1958, Parson first pointed out that a maximum exchange current density would be attained when the hydrogen adsorption free energy was close to thermoneutral ( $\sim 0$  eV)<sup>43</sup>. Norskov et al. plotted hydrogen adsorption free energy from DFT calculations versus experimental HER exchange current density<sup>44</sup>, and observed a volcano-shaped variation with the peak position close to platinum—note that platinum was the state-of-the-art HER catalyst with an almost zero overpotential and small Tafel slope. This volcano plot was further consummated in other studies in the literatures<sup>45, 46</sup>. These reports suggest that hydrogen adsorption free energy can be exploited as an effective descriptor in the design, engineering and optimization of HER catalysts. In our case, the H is adsorbed on top of the Mo atoms, which is the same as that on the surface of Pt. Therefore, the computational hydrogen electrode (CHE) method was used in this work to calculate hydrogen adsorption free energy. In addition, dilution models consistent with experiment were employed at very small applied potential.

According to the HAADF-STEM images of Mo<sub>2</sub>C NSs, the computational models of Mo<sub>2</sub>C with fcc/hcp, fcc/fcc, and hcp/hcp GBs were constructed, respectively. Specifically, Fig. 3e shows the superstructure of fcc/hcp heterophase GB in Mo<sub>2</sub>C nanosheets. Along the fcc/hcp heterophase edges, both hcp phase with “ABAB” stacking and fcc phase with “ABCABC” stacking are observed along the close-packed  $[110]_f/[11\bar{2}0]_h$  direction, which clearly reveals that the heterophase Mo<sub>2</sub>C GB is generated through the chemical connection of fcc(111) and hcp(002) slabs. By analogy, we used the software of VESTA to successfully construct fcc(111)/fcc(010) (Supplementary Fig. 19), hcp(002)/hcp(110), hcp(101)/hcp(110), hcp(010)/hcp(001),

and hcp(010)/hcp(101) models (Fig. 3a, c and Supplementary Fig. 16) to simulate the fcc/hcp, fcc/fcc, and hcp/hcp Mo<sub>2</sub>C GBs in actual material. The structural models obtained by subsequent optimization screening were shown in Supplementary Figs. 44, 45.

The reaction enthalpy during Mo<sub>2</sub>C synthesis was calculated by the enthalpy difference between the products and reactants after geometry optimization. MoO<sub>3</sub>/RGO intermediates with different water contents (0, 0.41, 7.14, 13.52, 18.56, 30.98, and 43.28 wt%) were obtained by freeze-drying. And HER performance tests found that Mo<sub>2</sub>C/NG and H-Mo<sub>2</sub>C/NG obtained from anhydrous MoO<sub>3</sub> and MoO<sub>3</sub> with water content of 18.56 wt% had the worst and best activities, respectively (Fig. 5). Accordingly, we choose the MoO<sub>3</sub> structure model with water free and water content of 18.56 wt% to study the mechanism of water action in the carbothermal reaction. We searched MoO<sub>3</sub> structures with different water contents in the previously published literatures, and found that the structure of IS<sub>NS</sub> with water content of 16% was similar to our experimental synthesized structure, and defined anhydrous MoO<sub>3</sub> as the IS<sub>NP</sub> structure. Since MoO<sub>3</sub> is a typical layered structure, the layers are staggered and arranged by van der Waals force, which makes it prone to decompose at high temperature. In our case, IS<sub>NP</sub> and IS<sub>NS</sub> first absorb heat and dissociate into transition states of TS<sub>NP</sub> and TS<sub>NS</sub>, respectively, and they then react with C atoms in RGO to form Mo<sub>2</sub>C.

The reaction enthalpy was calculated as:

$$\Delta H = H_{\text{products}} - H_{\text{reactants}} \quad (5)$$

## Supplementary References

1. Chen, W. F. et al. Highly active and durable nanostructured molybdenum carbide electrocatalysts for hydrogen production. *Energy Environ. Sci.* **6**, 943–951 (2013).
2. Shuai, S. et al. Improved synthesis of graphene oxide with controlled oxidation degree by using different dihydrogen phosphate as intercalators. *Chem. Phys.* **539**, 110938 (2020).
3. Lavin-Lopez, M. d. P., Romero, A., Garrido, J., Sanchez-Silva, L. & Valverde, J. L. Influence of different improved hummers method modifications on the characteristics of graphite oxide in order to make a more easily scalable method. *Ind. Eng. Chem. Res.* **55**, 12836–12847 (2016).
4. Li, S. et al. Metal-organic precursor-derived mesoporous carbon spheres with homogeneously distributed molybdenum carbide/nitride nanoparticles for efficient hydrogen evolution in alkaline media. *Adv. Funct. Mater.* **29**, 1807419 (2019).
5. Wang, Z. et al. Theoretical calculation guided electrocatalysts design: nitrogen saturated porous Mo<sub>2</sub>C nanostructures for hydrogen production. *Appl. Catal. B: Environ.* **257**, 117891(2019).
6. Yan, H. et al. Holey reduced graphene oxide coupled with an Mo<sub>2</sub>N-Mo<sub>2</sub>C heterojunction for efficient hydrogen evolution. *Adv. Mater.* **30**, 1704156 (2018).
7. Guo, Y. et al. Assembly of hollow mesoporous nanoarchitectures composed of ultrafine Mo<sub>2</sub>C nanoparticles on N-doped carbon nanosheets for efficient

- electrocatalytic reduction of oxygen. *Mater. Horiz.* **4**, 1171–1177 (2017).
8. Zheng, Y. et al. High electrocatalytic hydrogen evolution activity of an anomalous ruthenium catalyst. *J. Am. Chem. Soc.* **138**, 16174–16181 (2016).
  9. Zhang, L. S., Liang, X. Q., Song, W. G. & Wu, Z. Y. Identification of the nitrogen species on N-doped graphene layers and Pt/NG composite catalyst for direct methanol fuel cell. *Phys. Chem. Chem. Phys.* **12**, 12055–12059 (2010).
  10. Shou, H., Ferrari, D., Barton, D. G., Jones, C. W. & Davis, R. J. Influence of passivation on the reactivity of unpromoted and Rb-promoted Mo<sub>2</sub>C nanoparticles for CO hydrogenation. *ACS Catal.* **2**, 1408–1416 (2012).
  11. Duan, J., Chen, S., Ortíz-Ledón, C. A., Jaroniec, M. & Qiao, S. Z. Phosphorus vacancies that boost electrocatalytic hydrogen evolution by two orders of magnitude. *Angew. Chem. Int. Ed.* **59**, 8181–8186 (2020).
  12. Zang, Y. et al. Tuning orbital orientation endows molybdenum disulfide with exceptional alkaline hydrogen evolution capability. *Nat. Commun.* **10**, 1217 (2019).
  13. Liu, Y. et al. Self-optimizing, highly surface-active layered metal dichalcogenide catalysts for hydrogen evolution. *Nat. Energy* **2**, 17127 (2017).
  14. Jung, J.-H., Jeon, J.-H., Sridhar, V. & Oh, I.-K. Electro-active graphene-Nafion actuators. *Carbon* **49**, 1279–1289 (2011).
  15. Wu, J. et al. An efficient cobalt phosphide electrocatalyst derived from cobalt phosphonate complex for all-pH hydrogen evolution reaction and overall water splitting in alkaline solution. *Small* **16**, e1900550 (2020).

16. Kim, M. et al. Covalent 0D–2D heterostructuring of Co<sub>9</sub>S<sub>8</sub>-MoS<sub>2</sub> for enhanced hydrogen evolution in all pH electrolytes. *Adv. Funct. Mater.* **30**, 2002536 (2020).
17. Chen, J. et al. Co-Fe-P nanotubes electrocatalysts derived from metal-organic frameworks for efficient hydrogen evolution reaction under wide pH range. *Nano Energy* **56**, 225–233 (2019).
18. Cao, E. et al. Boron-induced electronic-structure reformation of CoP nanoparticles drives enhanced pH-universal hydrogen evolution. *Angew. Chem. Int. Ed.* **59**, 4154–4160 (2020).
19. Gao, B. et al. MoC nanodots toward efficient electrocatalytic hydrogen evolution: an interlayer-confined strategy with 2D-zeolite precursor. *J. Mater. Chem. A* **9**, 4724–4733 (2021).
20. Xiao, W. et al. Hierarchical ultrathin carbon encapsulating transition metal doped MoP electrocatalysts for efficient and pH-universal hydrogen evolution reaction. *Nano Energy* **70**, 104445 (2020).
21. Zhang, W. et al. Single-crystalline (Fe<sub>x</sub>Ni<sub>1-x</sub>)<sub>2</sub>P nanosheets with dominant {011  $\bar{1}\bar{1}$ } facets: efficient electrocatalysts for hydrogen evolution reaction at all pH values. *Nano Energy* **56**, 813–822 (2019).
22. Zheng, Z. et al. Boosting hydrogen evolution on MoS<sub>2</sub> via co-confining selenium in surface and cobalt in inner layer. *Nat. Commun.* **11**, 3315 (2020).
23. Liu, X. et al. Two birds with one stone: metal-organic framework derived micro-/nanostructured Ni<sub>2</sub>P/Ni hybrids embedded in porous carbon for electrocatalysis

- and energy storage. *Adv. Funct. Mater.* **29**, 1901510 (2019).
24. Zhang, Y.-Y. et al. Fe/P dual doping boosts the activity and durability of CoS<sub>2</sub> polycrystalline nanowires for hydrogen evolution. *J. Mater. Chem. A* **7**, 5195–5200 (2019).
  25. Yao, M. et al. Rational design of self-supported Cu@WC core-shell mesoporous nanowires for pH-universal hydrogen evolution reaction. *Appl. Catal. B: Environ.* **280**, 119451 (2021).
  26. Yu, J. et al. Metallic FePSe<sub>3</sub> nanoparticles anchored on N-doped carbon framework for all-pH hydrogen evolution reaction. *Nano Energy* **57**, 222–229 (2019).
  27. He, L. et al. Molybdenum carbide-oxide heterostructures: in situ surface reconfiguration toward efficient electrocatalytic hydrogen evolution. *Angew. Chem. Int. Ed.* **59**, 3544–3548 (2020).
  28. Zhao, L. et al. Active facet regulation of highly aligned molybdenum carbide porous octahedrons via crystal engineering for hydrogen evolution reaction. *Nano Energy* **77**, 105056 (2020).
  29. Wu, S. et al. Molybdenum carbide nanoparticles assembling in diverse heteroatoms doped carbon matrix as efficient hydrogen evolution electrocatalysts in acidic and alkaline medium. *Carbon* **171**, 385–394 (2021).
  30. Lin, Y. et al. Construction of CoP/NiCoP nanotadpoles heterojunction interface for wide pH hydrogen evolution electrocatalysis and supercapacitor. *Adv. Energy Mater.* **9**, 1901213 (2019).

31. Huang, H. et al. Conductive metal-organic frameworks with extra metallic sites as an efficient electrocatalyst for the hydrogen evolution reaction. *Adv. Sci.* **7**, 2000012 (2020).
32. Peng, O. et al. Hierarchical heterostructured nickel foam-supported  $\text{Co}_3\text{S}_4$  nanorod arrays embellished with edge-exposed  $\text{MoS}_2$  nanoflakes for enhanced alkaline hydrogen evolution reaction. *Mater. Today Energy* **18**, 100513 (2020).
33. Shuai, C. et al. Nickel/cobalt bimetallic phosphides derived metal-organic frameworks as bifunctional electrocatalyst for oxygen and hydrogen evolution reaction. *J. Alloys Compd.* **847**, 156514 (2020).
34. Cheng, H. et al.  $\text{CoMo}_2\text{S}_4$  with superior conductivity for electrocatalytic hydrogen evolution: elucidating the key role of Co. *Adv. Funct. Mater.* **31**, 2103732 (2021).
35. Jian, C., Cai, Q. & Liu, W. Three dimensional macroporous framework molybdenum disulfide-carbide heterojunction for highly efficient electrocatalytic hydrogen evolution at high current density. *Chem. Commun.* **57**, 11819–11822 (2021)
36. Huang, C. et al. N-doped Ni-Mo based sulfides for high-efficiency and stable hydrogen evolution reaction. *Appl. Catal. B: Environ.* **276**, 119137 (2020).
37. Huang, Z. et al. Selective selenization of mixed-linker Ni-MOFs:  $\text{NiSe}_2@\text{NC}$  core-shell nano-octahedrons with tunable interfacial electronic structure for hydrogen evolution reaction. *Appl. Catal. B: Environ.* **272**, 118976 (2020).
38. Xiong, J. et al. In situ engineering of double-phase interface in  $\text{Mo}/\text{Mo}_2\text{C}$



- heteronanosheets for boosted hydrogen evolution reaction. *ACS Energy Lett.* **3**, 341–348 (2018).
39. Huo, L. et al. Spatial confinement and electron transfer moderating Mo–N bond strength for superior ammonia decomposition catalysis. *Appl. Catal. B: Environ.*
40. Amama, P. B. et al. Role of water in super growth of single-walled carbon nanotube carpets. *Nano Lett.* **9**, 44–49 (2009).
41. Han, T. H., Huang, Y.-K., Tan, A. T. L., Dravid, V. P. & Huang, J. Steam etched porous graphene oxide network for chemical sensing. *J. Am. Chem. Soc.* **133**, 15264–15267 (2011).
42. Mathew, K., Sundararaman, R., Letchworth-Weaver, K., Arias, T. A. and Hennig, R. G. Implicit solvation model for density-functional study of nanocrystal surfaces and reaction pathways. *J. Chem. Phys.* **140**, 084106 (2014).
43. Parsons, R. The rate of electrolytic hydrogen evolution and the heat of adsorption of hydrogen. *Trans. Faraday Soc.* **54**, 1053–1063 (1958).
44. Nørskov, J. K. et al. Trends in the exchange current for hydrogen evolution. *J. Electrochem. Soc.* **152**, J23 (2005).
45. Greeley, J., Jaramillo, T. F., Bonde, J., Chorkendorff, I. B. & Nørskov, J. K. Computational high-throughput screening of electrocatalytic materials for hydrogen evolution. *Nat. Mater.* **5**, 909–913 (2006).
46. Zheng, Y. et al. Hydrogen evolution by a metal-free electrocatalyst. *Nat. Commun.* **5**, 3783 (2014).
