# Supplementary material for: Water induced ultrathin Mo2C nanosheets with high-density grain boundaries for enhanced hydrogen evolution
Source: PubMed Central journal article supplement (PMC9700844; doi:10.1038/s41467-022-34976-1), 2022-11-24
Supplement: 41467_2022_34976_MOESM3_ESM.pdf [file 41467_2022_34976_MOESM3_ESM.pdf]

## **Description of Additional Supplementary Files**

File Name: Supplementary Data 1

Description: The atomic coordinates of the H adsorption on the fcc/hcp GB model to generate Fig. 6e.
